1 The determinants of African Swine Fever Virus Virulence – the  
2 Georgia 2007/1 strain and the host macrophage response

3

4 Gwenny Cackett<sup>a§</sup>, Raquel Portugal<sup>b§</sup>, Dorota Matelska<sup>a</sup>, Linda Dixon<sup>b\*</sup> and Finn Werner<sup>\*a</sup>

5 <sup>a</sup>Institute for Structural and Molecular Biology, Darwin Building, University College London, Gower  
6 Street, London WC1E 6BT, United Kingdom

7 <sup>b</sup>Pirbright Institute, Ash Road, Pirbright, Surrey, GU24 0NF, United Kingdom

8 <sup>§</sup> have contributed equally to this work

9

10 Short Title:

11 The ASFV Georgia 2007/1 Strain Transcriptome

12 #Address correspondence to [linda.dixon@pirbright.ac.uk](mailto:linda.dixon@pirbright.ac.uk) and [f.werner@ucl.ac.uk](mailto:f.werner@ucl.ac.uk).

## 13 Abstract [217 words]

14 African swine fever virus (ASFV) has a major global economic impact. With a case fatality in domestic pigs  
15 approaching 100%, it currently presents the largest threat to animal farming. Although genomic  
16 differences between attenuated and highly virulent ASFV strains have been identified, the molecular  
17 determinants for virulence at the level of gene expression have remained opaque. Here we characterise  
18 the transcriptome of ASFV genotype II Georgia 2007/1 (GRG) during infection of the physiologically  
19 relevant host cells, porcine macrophages. In this study we applied Cap Analysis Gene Expression  
20 sequencing (CAGE-seq) to map the 5' ends of viral mRNAs at 5 and 16 hpi. A bioinformatics analysis of the  
21 sequence context surrounding the transcription start sites (TSSs) enabled us to characterise the global  
22 early and late promoter landscape of GRG. We compared transcriptome maps of the GRG isolate and the  
23 lab-attenuated BA71V strain that highlighted GRG virulent-specific transcripts belonging to multigene  
24 families including two newly characterised MGF 100 genes I7L and I8L. Structural homology modelling  
25 suggest that I7L and I8L encode unorthodox SH2 domain proteins with the potential to interfere with the  
26 host's immune response. In parallel, we monitored transcriptome changes in the infected host cells, which  
27 showed a pro-inflammatory immune response with the upregulation of NF- $\kappa$ B activated genes, innate  
28 immunity, as well as lysosome components including S100 proteins.

## 29 Author Summary [196 words]

30 African swine fever virus (ASFV) causes a haemorrhagic fever in domestic pigs and wild boar with mortality  
31 rates approaching 100%, for which there are no approved vaccines or antivirals. The highly-virulent ASFV  
32 Georgia 2007/1 strain was the first isolated when ASFV spread from Africa to the Caucasus region in 2007.  
33 From here it has spread through Eastern Europe, and more recently across Asia. We have used an RNA-  
34 based next generation sequencing technique called CAGE-seq to map the starts of viral genes across the  
35 ASFV Georgia 2007/1 strain DNA genome. This has allowed us to investigate how it controls its viral gene  
36 expression during different stages of infection in macrophage cells. We have characterised which genes  
37 are expressed at different levels during early or late stages of infection, and compared them to the non-  
38 virulent ASFV-BA71V strain to identify key genes that enhance virulence. We have discovered new genes,  
39 and predicted the likely roles of uncharacterised genes during ASFV infection. In parallel we have  
40 investigated how the host cells respond to ASFV infection, which has revealed how the virus early on

41 suppresses components of the host immune response to ultimately win the arms race against its porcine  
42 host.

## 43 [Introduction \[1,192 words\]](#)

44 ASFV originated in Sub-Saharan Africa where it remains endemic. However, following the introduction in  
45 2007 of a genotype II isolate to Georgia (1) and subsequent spread in Russia and Europe. The virus was  
46 then introduced to China in 2018 (2), from here it spread rapidly across Asia, strongly emphasizing this  
47 disease as a severe threat to global food security. ASFV is the only characterised member of the  
48 Asfarviridae family (3) in the recently classified Nucleocytoviricota (ICTV Master Species List 2019.v1)  
49 phylum (4,5). ASFV has a linear double-stranded DNA (dsDNA) genome of ~170–193 kbp encoding ~150–  
50 ~200 open reading frames (ORFs). Little is currently known about either the transcripts expressed from  
51 the ASFV genome or the mechanisms of ASFV transcription. Much of what is known about transcription  
52 is extrapolated from vaccinia virus (VACV), a distantly-related Nucleocytoviricota member, from the  
53 Poxviridae family (6). ASFV encodes a eukaryotic-like 8-subunit RNA polymerase (RNAP), an mRNA capping  
54 enzyme and poly-A polymerase, all of which are carried within mature virus particles. These virions are  
55 transcription competent upon solubilisation in vitro (7,8) and support mRNA modification by including a  
56 5'-methylated cap and a 3' poly-adenylated (polyA) tail of ~33 nucleotide-length (8,9).

57 Viral genes are typically classified according to their temporal expression patterns. ASFV genes have  
58 historically been categorised as 'immediate early' when expressed immediately following infection, as  
59 'early genes' following viral protein synthesis, as 'intermediate genes' after viral DNA replication, or as  
60 'late genes' thereafter. The temporal regulation of transcription is likely enabled by different sets of  
61 general transcription initiation factors that recognise distinct early (EPM) or late (LPM) promoter  
62 elements, as we previously investigated in the ASFV-BA71V strain (10), and address further in this study.  
63 EPM recognition is likely enabled by the ASFV homologue of heterodimeric VACV early transcription factor  
64 (VETF), consisting of D1133L (D6) and G1340L (A7) gene products (11,12). Both are late genes, i. e.  
65 synthesised late during infection and packaged into virus particles. The ASFV LPM is less well defined than  
66 the EPM, but a possible initiation factor involved in its recognition is the viral homolog of eukaryotic-like  
67 ASFV-encoded TATA-binding protein (TBP), expressed during early infection. By analogy with the VACV  
68 system, additional factors including homologs of A1, A2 and G8 may also contribute to late transcription  
69 (6)

70 We have recently carried out a detailed and comprehensive ASFV whole genome expression analysis using  
71 complimentary next-generation sequencing (NGS) results and computational approaches to characterise  
72 the ASFV transcriptome following BA71V infection of Vero cells at 5 hpi and 16 hpi post-infection (hpi)  
73 (10). Most of our knowledge about the molecular biology of ASFV, including gene expression, has been  
74 derived from attenuated virus strains, such as BA71V infecting Vero tissue culture cells (9,10). These  
75 model systems provide convenient models to study the replication cycle but have deletions of many genes  
76 that are not essential for replication, but have important roles in virulence within its natural porcine hosts.  
77 (13–15). To date 24 ASFV genotypes have been identified in Africa (15–22), while all strains spreading  
78 across Asia and Europe belong to the Type II genotype. Most of these are highly virulent in domestic pigs  
79 and wild boar, including the ASFV Georgia 2007/1 (GRG) (23), and the Chinese ASFV Heilongjiang, 2018  
80 (Pig/HLJ/18) (24) isolates. Though, a number of less virulent isolates have been identified in wild boar in  
81 the Baltic States and domestic pigs in China (25–28). It is crucial to understand the similarities and  
82 commonalities between ASFV strains, and to characterise the host response to these in order to  
83 understand the molecular determinants for ASFV pathogenicity. Information about the gene content and  
84 genome organisation can be gained from comparing virus genome sequences. However, only functional  
85 genomics such as transcriptome analyses can provide information about the differences in gene  
86 expression programmes and the host responses to infection.

87 On the genome level, most differences between virulent (e. g. GRG) and attenuated (e.g. lab-attenuated  
88 BA71V) ASFV strains reside towards the genome termini. Figure 1a shows a whole genome comparison of  
89 GRG (left) and BA71V (right) strains with the sequence conservation colour coded in different shades of  
90 blue. The regions towards the end of the chromosome are more dynamic compared to the central region  
91 of the chromosome that is highly conserved, as genes at the termini are prone to deletion, duplication,  
92 insertion and fusion (16,29). Most of the GRG-specific genes are expressed early during infection (early  
93 genes are colour coded blue in the outer arch of Figure 1a) and belong to Multi-Gene Families (MGFs,  
94 purple in the inner arch). The functions of many MGF members remain poorly understood, though  
95 variation among MGFs is linked to virulence (30). MGF 110 is not thought necessary for virulence in pigs  
96 due to few members being present in virulent isolate genomes (16), but are highly expressed both on the  
97 mRNA (10) and protein level (31), suggesting MGF 110 holds importance during infection. Overall, the  
98 functions of MGF 360 and 505 members are better characterised, playing a role in evading the host type  
99 I interferon (IFN) response (14,32–36). In summary, comparing the expression of ASFV genes, especially

100 MGFs between the virulent GRG- and the lab adapted BA71V strains, is fundamental in identification of  
101 virulence factors and better MGF characterisation.

102 Macrophages are the primary target cells for ASFV, they are important immune effector cells that display  
103 remarkable plasticity allowing efficient response to environmental signals (37). They can activate specific  
104 functional programs, which can be divided into two main groups: classically activated macrophages (M1)  
105 present during acute infections and alternatively activated macrophages (M2) (38). Infection of  
106 macrophages with virulent ASFV has been shown to inhibit the expression of IFN, cytokines, chemokines,  
107 adhesion molecules and other immunomodulatory genes, thereby interfering with M1 macrophage  
108 function (30). Our understanding of why virulent ASFV isolates like GRG can infect macrophages and win  
109 the battle with the host immune system, while attenuated strains like BA71V struggle to do so, currently  
110 relies on genomic comparison. Little is known about how host macrophages respond to infection apart  
111 from a microarray study of primary swine macrophage cells infected with GRG (39), and an RNA-seq study  
112 of whole blood isolated from pigs infected either with a low pathogenic ASFV isolate, OURT 88/3, or the  
113 highly pathogenic GRG (40).

114 Here we applied CAGE-seq to characterise the transcriptome of the highly virulent GRG isolate (23), in  
115 primary porcine macrophages, the biologically relevant target cells for ASFV infection. We have  
116 investigated the differential gene expression patterns of viral mRNAs at 5- and 16 hpi and mapped their  
117 promoter motifs. Importantly, we have compared the expression levels and temporal regulation of genes  
118 conserved in both strains. With a few exceptions, both mRNA expression levels and temporal regulation  
119 of the conserved genes are surprisingly similar between BA71V and GRG. This confirms that it is not  
120 deregulation of their conserved genes, but the virulent isolate-specific genes, which are the key  
121 determinants for ASFV virulence. Most of these genes are MGF members, likely involved in suppression  
122 of the host immune-response. The transcriptome analysis of the porcine macrophages upon GRG infection  
123 reflects a pro-inflammatory immune response with the upregulation of in particular NF-kB activated  
124 genes, but also innate immunity related and lysosome components.

## 125 [Results \[4,801 words\]](#)

### 126 [Genome-wide Transcription Start Site-Mapping](#)

127 We infected primary porcine alveolar macrophages with ASFV GRG at a high multiplicity of infection (MOI  
128 5.0), isolated total RNA at 5 hpi and 16 hpi and sequenced using CAGE-seq (Supplementary Table 1a). The

129 resulting mRNA 5' ends were mapped to the GRG genome (Figure 1b) resulting in the annotation of 229  
130 and 786 TSSs at 5 and 16 hpi, respectively (Figure 1c and d, from Supplementary Table 1b and c,  
131 respectively). The majority of TSSs were identified within 500 bp upstream of the start codon of a given  
132 ORF, a probable location for a *bona fide* gene TSS. The strongest and closest TSSs upstream of ORFs were  
133 annotated as 'primary' TSS (pTSS, listed in Supplementary Table 1d) and in this manner we could account  
134 TSS for 177 out of 189 GRG ORFs annotated in the FR682468.1 genome. TSSs signals below the threshold  
135 for detection included MGF\_110-11L, C62L, and E66L, the remainder being short ORFs designated as  
136 'ASFV\_G\_ACD', predicted solely from the FR682468 genome sequence (23). The E66L ORF was originally  
137 predicted from only the BA71V genome sequence, but likewise undetectable with CAGE-seq (10), making  
138 its expression unlikely. Our TSS mapping identified novel ORFs (nORFs) downstream of the TSS, which  
139 were included in the curated GRG genome map (Supplementary Table 1d includes pTSSs of annotated  
140 ORFs and nORFs in gene feature file or 'GFF' format). In addition to ORF-associated TSSs, some were  
141 located within ORFs (intra-ORF or ioTSS), or in between them (inter-ORF TSS), and all detected TSSs are  
142 listed in Supplementary Table 1b-c.

### 143 Expression of GRG genes during Early and Late Infection

144 Having annotated TSSs across the GRG genome, we quantified the viral mRNAs originating from pTSSs  
145 from CAGE-seq data, normalising against the total number of reads mapping to the ASFV genome (i. e.  
146 RPM or reads per million mapped reads per sample). We compared gene expression between early and  
147 late infection, and simplistically defined genes as 'early' or 'late' if they are significantly down- or  
148 upregulated (respectively), using DESeq2 (41). In summary, 165 of the 177 detectable genes were  
149 differentially expressed (adjusted p-value or padj < 0.05, Supplementary Table 1e). Those showing no  
150 significant change were D345L, DP79L, I8L, MGF\_100-1R, A859L, QP383R, B475L, E301R, DP63R, C147L,  
151 and I177L. 87 of those 165 differentially expressed genes were significantly downregulated, thus  
152 representing the 'early genes', while 78 of the 165 genes were upregulated or 'late genes'. The majority  
153 of MGFs were early genes, apart from MGF 505-2R, MGF360-2L and MGF 100-1L (Figure 2a). Figure 2b  
154 shows the expression patterns of GRG-exclusively expressed genes, which we defined as only having a  
155 detectable CAGE-seq TSS in GRG, and not in BA71V (regardless of presence in the BA71V genome). These  
156 unsurprisingly, consist of many MGFs (18), all of which were early genes (Figure 2b), barring MGF 100-1L.  
157 We extracted the top twenty most highly expressed genes of GRG (as RPM) during 5 hpi (Figure 2c) and  
158 16 hpi (Figure 2d) post-infection. Ten genes are shared between both top 20 lists: MGF 110-3L, A151R,

159 MGF 110-7L, MGF 110-5L-6L, I73R, 285L, CP312R, ASFV\_G\_ACD\_00600, MGF 110-4L, and CP204L. It is  
160 important to note that the relative expression values (RPM) for genes at 5 hpi are significantly higher than  
161 those at 16 hpi. This is consistent with our observations in the BA71V strain (10) and due to the increase  
162 in global transcript levels during late infection discussed below. Supplementary Table 1f includes all the  
163 GRG annotated ORFs, their TSS locations during early and late infection, their relative distances if these  
164 TSS locations differ, and their respective Untranslated Region (UTR) lengths.

### 165 GRG and BA71V Share Strong Similarity between Conserved Gene Expression

166 Next we carried out a direct comparison of mRNA levels from the 132 conserved genes between the  
167 virulent GRG and attenuated BA71V (10) strain making use of our previously published CAGE-seq data.  
168 The relative transcript levels (RPM) of the genes conserved between the two strains showed a significant  
169 correlation at 5 hpi (Figure 3a) and 16 hpi (Figure 3b), supported by the heatmap in Supplementary Figure  
170 1, the RPM for each gene, across both time-points and replicates, showing a strong congruence between  
171 the two strains. Of the 132 conserved genes, 125 showed significant differential expression in both strains.  
172 119 of these 125 showed the same down- or up-regulated patterns of significant differential expression  
173 from 5 hpi to 16 hpi (Figure 3c, early genes in blue, late genes in red). The exceptions are D205R, CP80R,  
174 C315R, NP419L, F165R, and DP148R (MGF 360-18R), encoding RNA polymerase subunits RPB5 and RPB10  
175 (14), Transcription Factor IIB (TFIIB) (14), DNA ligase (42), a putative signal peptide-containing protein,  
176 and a virulence factor (43), respectively. The ASFV-TFIIB homolog (C315R) is classified as an early gene in  
177 GRG but not in BA71V, in line with the predominantly early-expressed TBP (B263R), its predicted  
178 interaction partner. It is worth noting however, that D205R, CP80R, and C315R are close to the threshold  
179 of significance, with transcripts being detected at both 5 hpi and 16 hpi (Supplementary Table 1e).

### 180 Increased and pervasive transcription during late infection

181 During late infection of BA71V (10), we noted an increase in genome-wide mRNA abundance, as well as  
182 an increasing number of TSSs and transcription termination sites, reminiscent of pervasive transcription  
183 observed during late Vaccinia virus (44). To quantify and compare the global mRNA increase both in BA71V  
184 and GRG, we calculated the ratio of read coverage at 16 hpi versus 5 hpi (log<sub>2</sub> transformed ratio of RPM)  
185 per nucleotide across the viral genome (Figure 4a, increase shown above- and decrease below the x-axis).  
186 This dramatic increase is due to the overall increase of virus mRNAs present, which is visible in both strains  
187 (Figure 4b), with a ~2 fold increase in GRG from 5 hpi to 16 hpi, versus ~8 fold in BA71V (Figure 4c).



188 This observation can at least in part be attributed to the larger number of viral genomes during late  
189 infection, with increased levels of viral RNAP and associated factors available for transcription, following  
190 viral protein synthesis. Viral DNA-binding proteins, such as histone-like A104R (45), may remain associated  
191 with the genome originating from the virus particle in early infection. This could suppress spurious  
192 transcription initiation, compared to freshly replicated nascent genomes that are highly abundant in late  
193 infection. In order to test whether the increased mRNA levels correlated with the increased number of  
194 viral genomes in the cell, we determined the viral genome copy number by using quantitative PCR (qPCR  
195 against the p72 capsid gene sequence) using purified total DNA from infected cells isolated at 0 hpi, 5 hpi  
196 and 16 hpi, and normalized values to the total amount of input DNA. Using this approach, we observed  
197 genome copy levels that were consistent from 0 hpi to 5 hpi, followed by a substantial increase at 16 hpi,  
198 which was more pronounced in BA71V infection (Figure 4d). This corresponded to a 15-fold increase in  
199 GRG genome copy numbers from late, compared to early times post-infection of porcine macrophages,  
200 and a 30-fold increase in BA71V during infection of Vero cells (Figure 4e). In summary, the ASFV  
201 transcriptome changes both qualitatively and quantitatively as infection progresses, and the increase of  
202 virus mRNAs during late infection is accompanied by the dramatic increase in viral genome copies.  
203 Interestingly, the increase in viral transcripts and genome copies was less dramatic in the virulent GRG  
204 strain.

### 205 [Correcting the bias of temporal expression pattern](#)

206 The standard methods of defining differential gene expression are well established in transcriptomics  
207 using programs like DESeq2 (41). This is a very convenient and powerful tool which captures the nuances  
208 of differential expression in complex organisms. However, virus transcription is often characterised by  
209 more extreme changes, typically ranging from zero to millions of reads. Furthermore, in both BA71V and  
210 GRG strains the genome-wide mRNA levels and total ASFV reads increase over the infection time course  
211 (Figure 4 and Supplementary Table 1a). As a consequence, such normalisation against the total mapped  
212 transcripts per sample (RPM) generates overestimated relative expression values at 5 hpi, and  
213 understates those at 16 hpi (10). In order to validate the early-late expression patterns derived from CAGE-  
214 seq, we carried out RT-PCR for selected viral genes, as this signal is proportionate to the number of specific  
215 mRNAs regardless of the level of other transcripts – with the minor caveat that it can pick up readthrough  
216 transcripts from upstream genes. We tested differentially expressed conserved genes including GRG early-  
217 (MGF505-7R, MGF505-9R, NP419L), and D345L which showed stable relative expression values (RPM  
218 values in Figure 1e). All selected genes showed a consistently stronger RT-PCR signal during late infection



219 in both BA71V and GRG (Figure 5a-d). The exception is NP419L whose levels were largely unchanged, and  
220 this is an example of how a gene whose transcript levels remain constant would be considered  
221 downregulated, when almost all other mRNA levels increase (Figure 5b).

222 The standard normalisation of NGS reads against total mapped reads (RPM) is regularly used as it enables  
223 a statistical comparison between samples and conditions, subject to experimental variations (46). Keeping  
224 this in mind, we used an additional method of analysing the 'raw' read counts to represent global ASFV  
225 transcript levels that are not skewed by the normalisation against total mapped reads. Figure 5 shows a  
226 side-by-side comparison of RT-PCR results, and the CAGE-seq data normalised (RPM) or expressed as raw  
227 counts, beneath each RT-PCR gel. Unlike CAGE-seq, RT-PCR will detect transcripts originating from read-  
228 through of transcripts initiated from upstream TSS including intra-ORF TSS (ioTSSs). To detect such  
229 'contamination' we used multiple primer combinations in upstream and downstream segments of the  
230 gene (Figure 5c, cyan and yellow arrows) to capture and account for possible variations. Overall, our  
231 comparative analyses shows that the normalised data (RPM) of early genes such as MGF505-7R and 9R  
232 indeed skews and overemphasises their early expression, while the raw counts are in better agreement  
233 with the mRNA levels detected by RT-PCR. In contrast, late genes such as NP419L and D345L would be  
234 categorised as late using all three quantification methods, in agreement with GRG CAGE-seq but not  
235 BA71V from Figure 3c. We validated the expression pattern of the early GRG-specific gene MGF360-12L  
236 (Figure 5e). While the RPM values indicated a very strong decrease in mRNA levels from early to late time  
237 points, the decrease in raw counts was less pronounced and more congruent with the RT-PCR analysis,  
238 showing a specific signal with nearly equal intensity during early and late infection. Lastly, we used qRT-  
239 PCR to quantify C315R transcript levels, as this was close to the early vs late threshold, (a log2fold change  
240 of 0 in Figure 3c), which showed again that qRT-PCR better agreed with the raw counts.

#### 241 [An improved temporal classification of ASFV genes](#)

242 Based on the considerations above, we prepared a revised classification of temporal gene expression of  
243 the genes conserved between the two strains based on raw counts. The heatmap in Figure 6a shows the  
244 mRNA levels at early and late infection stages of BA71V and GRG strains (all in duplicates) with the genes  
245 clustered into five subcategories (1 to 5, Figure 6a) according to their early and late expression pattern,  
246 which are shown in Figure 6b. Genes that are expressed at high or intermediate levels during early  
247 infection but that also show high or intermediate mRNA levels during late infection are classified as 'early'  
248 genes belonging to cluster-1 (8 genes, levels: high to high, H-H), cluster-4 (33 genes, mid to mid, M-M)

249 and cluster-5 (16 genes, low-mid to low-mid, LM-LM). Genes with low or undetectable mRNA levels during  
250 early infection, which increase to intermediate or high levels during late infection are classified as 'late'  
251 genes and belong to cluster-2 (15 genes, low to high, L-H) and cluster-3 (60 genes, low to mid, L-M),  
252 respectively. Overall, the clustered heatmap based on raw counts shows a similar but more emphasised  
253 pattern compared to the normalised (RPM) data (compare Figure 6 and Supplementary Figure 1).  
254 Calculating the percentage of reads per gene, which can be detected at 16 hpi compared to 5 hpi, reveals  
255 only a small number of genes have most ( $\geq 70\%$ ) of their reads originating during early infection: 30 genes  
256 in the GRG strain and 5 genes in the BA71V strain. For over half of the BA71V-GRG conserved genes, 90-  
257 100 % of reads can be detected during late infection (Figure 6c). For all GRG genes, this generates a  
258 significant difference between the raw counts per gene between time-points (Figure 6d).

259 Below we discuss specific examples of genes subcategorised in specific clusters. I73R is among the top  
260 twenty most-expressed genes during both early and late infection according to the normalised RPM values  
261 (Figure 2c and d) resides in cluster-1 (H-H) (Figure 6a). While I73R is expressed during early infection, the  
262 mRNA levels remain high with  $>1/3$  of all reads detected during late infection in both strains when  
263 calculated as raw counts (34 % in GRG and 45 % in BA71V). This new analysis firmly locates I73R into  
264 cluster-1 (H-H) and is classified confidently as early gene. Notably, our new approach results in biologically  
265 meaningful subcategories of genes that are likely to be coregulated, e. g. the eight key genes that encode  
266 the ASFV transcription system including RNAP subunits RPB1 (NP1450L), RPB2 (EP1242L), RPB3 (H359L),  
267 RPB5 (D205R), RPB7 (D339L) and RPB10 (CP80R), the transcription initiation factor TBP (B263R) and the  
268 capping enzyme (NP868R) belong to cluster-4 (M-M), and transcription factors TFIIS (I243L) and TFIIB  
269 (C315R) belong to cluster-5 (LM-LM). The overall mRNA levels of cluster-4 and -5 genes are different, but  
270 remain largely unchanged during early and late infection, consistent with the transcription machinery  
271 being required throughout infection. In contrast, the mRNAs encoding the transcription initiation factors  
272 D6 (D1133L) and A7 (G1340L) are only present at low levels during early- but increase during late infection  
273 and thus belong to cluster-3 (L-M), classifying them as late genes. This is meaningful since the  
274 heterodimeric D6-A7 factor is packaged into viral particles (7), presumably during the late stage of the  
275 infection cycle. The mRNAs of the major capsid protein p72 (B646L) and the histone-like-protein A104R  
276 (45,47) follow a similar late pattern but are present at even higher levels during late infection and  
277 therefore belong to cluster-2 (L-H).

## 278 Architecture of ASFV promoter motifs

279 In order to characterise early promoter motifs (EPM) in the GRG strain, we extracted sequences 35 bp  
280 upstream of all early gene TSSs and carried out multiple sequence alignments. As expected, this region  
281 shows a conserved sequence signature in good agreement with our bioinformatics analyses of EPMs in  
282 the BA71V strain, including the correct distance between the EPM and the TSS (9-10 nt from the EPM 3'  
283 end) and the 'TA' motif characteristic of the early gene Initiator (Inr) element (Figure 7a) (10). A motif  
284 search using MEME (48) identified a core (c)EPM motif with the sequence 5'-AAAATTGAAT-3' (Figure 7b),  
285 within the longer EPM. The cEPM is highly conserved and is present in almost all promoters controlling  
286 genes belonging to cluster-1, -4 and -5 (Supplementary Table 3). A MEME analysis of sequences 35 bp  
287 upstream of late genes (Figure 7c), provided a 17-bp AT-rich core late promoter motif (cLPM, Figure 7d),  
288 however, this could only be detected in 46 of the late promoters.

289 In an attempt to improve the promoter motif analyses and deconvolute putative sequence elements  
290 further, we probed the promoter sequence context of the five clusters (clusters 1-5 in Figure 7e-i,  
291 respectively) of temporally expressed genes with MEME (Supplementary Table 3). The early gene  
292 promoters of clusters-1 (H-H), -4 (M-M) and -5 (LM-LM) are each associated with different expression  
293 levels, and all of them contain the cEPM located 15-16 nt upstream of the TSS with two exceptions that  
294 are characterized by relatively low mRNA levels (Figure 7k). Interestingly, cluster-2 (L-H) promoters are  
295 characterized by a conserved motif with significant similarity to eukaryotic TATA-box promoter element  
296 that binds the TBP-containing TFIID transcription initiation factor (Figure 7f highlighted with red bracket,  
297 detected via Tomtom (49) analysis of the MEME motif output). Cluster-3 (L-M) promoters contain a long  
298 motif akin to the cLPM, derived from searching all late gene promoter sequences, and which is similar to  
299 the LPM identified in BA71V (Figure 7d and g, green bracket). All motifs described in the cluster analysis  
300 above could be detected with statistically significance ( $p$ -value  $< 0.05$ ) via MEME, in every gene in each  
301 respective cluster with only two exceptions: MGF 110-3L from cluster-1, and MGF 360-19R from cluster-  
302 4, for the latter see details below.

## 303 Updating Genome Annotations using Transcriptomics Data

304 TSS-annotation provides a useful tool for re-annotating predicted ORFs in genomes like ASFV (10) where  
305 many of the gene products have not been fully characterized and usually rely on prediction from genome  
306 sequence alone. We have provided the updated ORF map of the GRG genome in GFF format  
307 (Supplementary Table 1f). This analysis identified an MGF 360-19R ortholog (Figure 8), demonstrating how

308 transcriptomics enhances automated annotation of ASFV genomes by predicting ORFs from TSSs. The  
309 MGF 360-19R was included in subsequent DESeq2 analysis showing it was not highly nor significantly  
310 differentially expressed (Supplementary Table 1e). Another important feature is the identification of intra-  
311 ORF TSSs (ioTSSs) within MGF 360-19R that potentially direct the synthesis of N-terminally truncated  
312 protein variants expressed either during early or late infection. The presence of EPM and LPM promoter  
313 motifs lends further credence to the ioTSSs (Figure 8). Similar truncation variants were previously reported  
314 for I243L and I226R (50) and in BA71V (10). In addition, we detected multiple TSSs within MGF 360-19R  
315 encoding very short putative novel ORFs (nORF) 5, 7 or 12 aa residues long; since these ioTSSs were  
316 present in both early and late infection they are not all likely to be due to pervasive transcription during  
317 late infection.

318 We investigated the occurrence of ioTSS genome wide and uncovered many TSSs with ORFs downstream  
319 that were not annotated in the GRG genome (Supplementary Table 2a). These ORFs could be divided into  
320 sub-categories: in-frame truncation variants (Supplementary Table 2b, akin to MGF 360-19R in Figure 8),  
321 nORFs (Supplementary Table 2c), and simply mis-annotated ORFs. All updated annotations are found in  
322 Supplementary Table 1f. Putative truncation variants generated from ioTSSs were predominantly  
323 identified during late infection, suggesting these could be a by-product of pervasive transcription.  
324 Therefore, those detected early or throughout infection are perhaps more interesting, they span a variety  
325 of protein functional groups, and many gene-products are entirely uncharacterised (Figure 9a). The  
326 truncation variants additionally showed a size variation of 5'-UTRs between the ioTSSs and downstream  
327 start codon (Figure 9b). An example of a mis-annotation would be CP204L (Phosphoprotein p30, Figure  
328 9c) gene that is predicted to be 201 residues long. The TSS determined by CAGE-seq and validated by  
329 Rapid Amplification of cDNA Ends (5'-RACE) is located downstream of the annotated start codon; based  
330 on our results we reannotated the start codon of CP204L which results in a shorter ORF of 193 amino acids  
331 (Figure 9c).

332 Our GRG TSS map led to the discovery of many short nORFs, which are often overlooked in automated  
333 ORF annotations due to a minimum size, e. g. 60 residues in the original BA71V annotation (14). Some  
334 short ORFs have been predicted for the GRG genome including those labeled 'ASFV\_G\_ACD' in the Georgia  
335 2007/1 genome annotation (18). However, their expression was not initially supported by experimental  
336 evidence, though we have now demonstrated their expression via CAGE-seq (Figure 2b, Supplementary  
337 Table 1e). We have now identified TSSs for most of these short ORFs, indicating at minimum they are

338 transcribed. As described above, we noted that TSSs were found throughout the genome in intergenic  
339 regions in addition to those identified upstream of the 190 annotated GRG ORFs (including MGF 360-19R,  
340 Supplementary Table 2c). Our systematic, genome-wide approach identified 175 novel putative short  
341 ORFs. BLASTP (51) alignments showed that 13 were homologous to ORFs predicted in other strains,  
342 including DP146L and pNG4 from BA71V . We validated the TSSs for these candidates using 5'-RACE, which  
343 demonstrates the presence of these mRNAs and their associated TSSs at both time-points (Figure 9f and  
344 g, respectively), compared to our CAGE-seq data (Figure 9f and g, respectively).

### 345 Identification of Functional Domains in Uncharacterised Genes

346 Our understanding of the ASFV genome is hampered by the large number of genes with unknown  
347 functions. We attempted to remedy this limitation by systematically identifying conserved domains of 47  
348 MGF members and 46 uncharacterised ASFV-GRG genes. These candidates included ten genes that are  
349 among the highest-expressed genes and ten genes whose protein products are present in viral particles  
350 (7). The MGF 100 genes form the smallest multigene family include three short (100–150 aa) paralogs  
351 located at both genome ends (right, R and left, L): 1R, 2L (DP141L in BA71V), and 3L (DP146L in BA71V)  
352 (29). We predicted the two highly similar GRG ORFs called I7L and I8L (51% sequence identity) to be  
353 additional members of the MGF 100 family (Figure 10a). The conservation of I7L and I8L MGF 100  
354 members in more virulent and specifically porcine-infecting ASFV strains, combined with their early  
355 expression in GRG from our data, and their deletion reducing virulence in swine (52), suggests I7L and I8L  
356 play an important role during early infection of porcine macrophages hosts . Through extensive HHpred  
357 searches (53), we found that they all include a Src Homology 2 (SH2) domain, with detectable similarity to  
358 the N-terminal domain of *C. elegans* Cell death abnormality protein 2, ced-2 (54) (11% seq. id. between  
359 I7L and ced-2, E = 0.002 (Figure 10b). SH2 domains, including ced-2, are important protein-protein  
360 interaction domains that interact with phospho-tyrosine (pTyr) residues as a part of larger signaling  
361 cascades (55). We subsequently generated computational homology models of I7L and I8L, and  
362 interestingly both have lost the invariant arginine  $\beta$ B5 from the canonical pTyr binding pocket, suggesting  
363 either a different function or a different mode for recognition of phosphorylated amino acid residues  
364 (Figure 10c). In that context it is noteworthy that ASFV genomes encode a putative kinase R298L, which is  
365 homologous to vaccinia virus B1R gene (56). Both I7L and I8L show similar overall expression levels to the  
366 MGF 100 members. 1L and 1R are already annotated in the GRG genome (Supplementary Figure 1e), I7L  
367 and I8L are both early genes, while MGF 100-1L and 1R are late and not significantly changing,  
368 respectively.

369 We characterised another gene product, C717R, which is expressed at relatively low levels (< 200 RPM),  
370 but upregulated from early to late infection (Supplementary Figure 1e). C717R includes a central domain  
371 that is similar to serine/threonine kinases (18% amino acid seq. id. to Vps34, pdb id: 5DFZ over 221 aa, E  
372 = 8.4e-15 (Supplementary Figure 3). Besides Asfarviridae, it is conserved also in various Kaumobebavirus  
373 and Faustovirus strains. Computational homology modelling shows that, similar to R298L, the canonical  
374 ATP-binding loop ('GxGxxG') has been lost, while the catalytic loop ('HRD' motif) is conserved in a slightly  
375 modified form (as 'HAD', Supplementary Figure 3). Also, activation segment residues (typically 'DFG') are  
376 not conserved in C717R homologs ('DRN' in ASFV).

377 Finally, we investigated the K421R gene product. ASFV transcripts are thought to be polyadenylated by a  
378 polyA polymerase (C475L), which is highly conserved with other poxvirus and mimivirus viral polyA  
379 polymerases or vPAPs (57). Surprisingly, we discovered that Asfarviridae and related genomes (Abalone  
380 asfarvirus, Pacmanvirus, and Faustovirus) encode another vPAP member, represented by K421R in ASFV  
381 GRG (12% seq. id. to vPAP, pdb id: 4P37, E = 2.5e-60, (Supplementary Figure 4a). Computational homology  
382 modelling of K421R paralogues suggest that they contain the N-terminal dimerisation helix that is  
383 characteristic for homodimeric self-processive vPAPs (58) but have lost two out of three acidic active site  
384 residues (Supplementary Figure 4b). Consequently, they are predicted to be unable to coordinate metal  
385 ions necessary for polyA addition and carry out an unusual unknown function. K421R is a late gene, as the  
386 transcript is not detected at 5 hpi and increases to ~550 RPM at 16 hpi, while C475L (polyA polymerase)  
387 is also expressed late, but at ~3 times the level of K421R (Supplementary Table 1e). Even more intriguing  
388 is the fact that both vPAPs are packaged in viral particles (7), suggesting both may be required for early  
389 gene expression.

### 390 [The response of the porcine macrophage transcriptome to ASFV infection](#)

391 In order to evaluate the impact of ASFV on the gene expression of the host cell, we analysed  
392 transcriptomic changes of infected porcine macrophages using the CAGE-seq data from 0 (uninfected  
393 cells), at 5 and 16 hpi. We annotated 9,384 macrophage-expressed protein-coding genes with CAGE-  
394 defined TSSs (Supplementary Table 4). Although primary macrophages are known to vary largely in their  
395 transcription profile, the CAGE-seq reads were highly similar between samples (Spearman's correlation  
396 coefficients  $\geq 0.77$ ).

397 As TSSs are not well annotated for the swine genome, we annotated them *de novo* using our CAGE-seq  
398 data with the RECLU pipeline. 37,159 peaks could be identified, out of which around half (18,575) matched



399 unique CAGE-derived peaks annotated in Robert et al. (59) i.e. they were located closer than 100 nt to the  
400 previously described peaks. Mapping CAGE-seq peaks to annotated swine protein-coding genes led to  
401 identification of TSSs for 9,384 macrophage-expressed protein-coding genes (Supplementary Table 4). The  
402 remaining 11,904 swine protein-coding genes did not have assigned TSSs, and therefore their expression  
403 levels were not assessed. The majority of genes were assigned with multiple TSSs, and these TSS-assigned  
404 genes, were many critical functional macrophage markers, including genes encoding 56 cytokines and  
405 chemokines (including CXCL2, PPBP, CXCL8 and CXCL5 as the most highly expressed), ten S100 calcium  
406 binding proteins (S100A12, S100A8, and S100A9 in the top expressed genes), as well as interferon and  
407 TNF receptors (IFNGR1, IFNGR2, IFNAR1, IFNAR2, IFNLR1, TNFRSF10B, TNFRSF1B, TNFRSF1A, etc.), and  
408 typical M1/M2 marker genes such as TNF, ARG1, CCL24, and NOS2 (Supplementary Table 5). The mRNA  
409 levels of genes of interest were verified using RT-PCR (Figure 11f).

410 The 9,384 genes with annotated promoters were subjected to differential expression analysis using  
411 DESeq2 to compare the three time points (0, 5 and 16) in a pairwise manner. Expression of only 25 host  
412 genes was significantly deregulated between 0 and 5 hpi, compared to 652 genes between 5 hpi and 16  
413 hpi, and 1325 genes between 0 and 16 hpi (at FDR of 0.05). This implies that the major host transcriptomic  
414 response to ASFV does not occur during the early phase of infection. Based on the pairwise comparisons,  
415 we could distinguish major response profiles of the host genes. Late response genes, whose expression  
416 was significantly deregulated both between 0 and 16 hpi and 5 and 16 hpi, and early response genes,  
417 whose expression was significantly deregulated both between 0 and 5 hpi, but not later (Figure 11a). The  
418 latter category included only 20 genes, whereas more than 500 genes showed the late differentially  
419 regulated response: 344 genes were up-regulated, and 180 genes were down-regulated. Comparison of  
420 differences between expression levels at the three time points indicate that macrophage differentially  
421 expressed transcription programs start mostly after 5 hpi (Figure 11b and c) i. e. if a gene's expression  
422 changes, it has usually happens between 5 hpi and 16 hpi. The upregulated late response genes with  
423 highest expression levels included several S100 calcium binding proteins. In contrast, initially high  
424 expression of important cytokines (including CCL24, CXCL2, CXCL5 and CXCL8) significantly decreased from  
425 5 hpi to 16 hpi (Figure 11d).

426 To investigate the transcriptional response pathways and shed light on possible transcription factors  
427 involved in the macrophage response to ASFV infection, we searched for DNA motifs enriched in  
428 promoters of the four categories of deregulated genes in Figure 11a. Both late response promoter sets  
429 were significantly enriched with motifs, some of which contained sub-motifs known to be recognised by  
15



430 human transcription factors (Supplementary Figure 2). The highest-scored motif found in promoters of  
431 upregulated genes contained a sub-motif recognised by a family of human interferon regulatory factors  
432 (IRF9, IRF8 and IRF8, Supplementary Figure 2a) that play essential roles in the anti-viral response.  
433 Interestingly, both upregulated and downregulated promoters (Supplementary Figure 2b and c,  
434 respectively) were enriched with extended RELA/p65 motifs. p65 is a Rel-like domain-containing subunit  
435 of the NF-kappa-B complex, regulated by I-kappa-B, whose analog is encoded by ASFV. This pathway being  
436 a known target for ASFV in controlling host transcription (60–63).

437 To understand functional changes in the macrophage transcriptome, we also performed gene set  
438 enrichment analysis using annotations of human homologs. The top enriched functional annotations in  
439 the upregulated late response genes include glycoproteins and disulfide bonds, transmembrane proteins,  
440 innate immunity, as well as positive regulation of inflammatory response (Figure 11e). In contrast, sterol  
441 metabolism, rRNA processing, cytokines, TNF signalling pathway, inflammatory response as well as innate  
442 immunity were the top enriched functional clusters among the downregulated late response genes.  
443 Interestingly, the genes associated with innate immunity appear overrepresented in both up- and  
444 downregulated gene subsets, yet cytokines are 8-fold enriched only in the downregulated genes.

## 445 Discussion [2,366 words]

446 In order to shed light on the gene expression determinants for ASF virulence, we focussed our analyses  
447 on the similarities and differences in gene expression between a highly virulent Georgia 2007/1 isolate  
448 and a nonvirulent, lab-adapted strain (BA71V). Previous annotation identified 125 ASFV ORFs that are  
449 conserved between all ASFV strain genomes irrespective of their virulence (15). These represent a ‘core’  
450 set of genes required for the virus to produce infectious progeny and include gene products like those  
451 involved in virus genome replication, virion assembly, RNA transcription and modification, these are  
452 located in the central region of the genome (Figure 1a). Besides these essential genes, about one third are  
453 non-essential genes for replication, but have roles in evading host defence pathways. Some genes are  
454 conserved between isolates, but not necessarily essential core genes, for example apoptosis inhibitors:  
455 Bcl-2 family member A179L and IAP family member A224L. Other non-essential genes, especially MGF  
456 members, vary in number between isolates. Our transcriptomics analysis captured 119 genes both shared  
457 between the BA71V and GRG genomes, and also match expression patterns during early and late  
458 infection, according to CAGE-seq (Figure 3, Figure 4a-c). Outliers include DP148R, which is obvious, given  
459 its promoter region is deleted in BA71V, and its coding region is interrupted by a frame shift mutation,

460 therefore functional protein expression unlikely. DP148R is a non-essential, early-expressed virulence  
461 factor in the Benin 97/1 strain (43) – consistent with our GRG data. Many additional GRG genes, lost from  
462 BA71V are MGFs, which are mostly upregulated during early infection and located at the ends of the linear  
463 genome (Figure 1a). MGFs have evolved on the virus genome by gene duplication, and do not share  
464 significant similarity to other proteins, though some conserved domains, including ankyrin repeats are  
465 present in some MGF 360 and 505 family members (16,18).

466 We have predicted the function of two novel MGF 100 members to be SH2 domain-containing protein  
467 that have lost the canonical pTyr-binding pocket. Although SH2 domains are primarily specific to  
468 eukaryotes, rare cases of horizontally transferred SH2 domains, found in viruses, are implicated in  
469 hijacking host cell pTyr signalling (64). A large family of ‘super-binding’ SH2 domains were discovered in  
470 Legionella. Its members, including single SH2 domain-proteins are likely effector proteins during infection  
471 (65). Interestingly, loss of MGF 100 members was observed during the process of adapting a virulent  
472 Georgia strain to grow in cultured cell lines (66). We also identified a further MGF 100 member in the GRG  
473 genome as one of our nORFs, a partial 100-residue copy of DP146L (MGF 100-3L) (Supplementary Table  
474 2c). Unlike its annotated MGF 100-1L and MGF 100-1R cousins it was downregulated from 5 hpi to 16 hpi  
475 (Supplementary Table 1e). Together with I7L and I8L GRG encodes a total of 5 MGF 100 genes.

476 The Georgia 2007/1 genome was recently re-sequenced which identified a small number of genome  
477 changes affecting mapped ORFs and identified new ORFs (17). Adjacent to the covalently cross-linked  
478 genome termini, the BA71V genome contains terminal inverted repeats of >2 kbp, in which two short  
479 ORFs were identified (DP93R, DP86L). These were not included in previous GRG sequence annotations,  
480 however our nORFs included a 55-residue homolog of DP96R, which was a late, but not highly expressed  
481 gene. These are yet further examples of how transcriptomics aid in improving ASFV genome annotation.  
482 Functional data is available for only a few of proteins coded by ORFs not conserved between BA71V and  
483 GRG. This includes the p22 protein (KP177R), which is expressed on the cell membrane during early  
484 infection, and also incorporated into the virus particle inner envelope. The function of the KP177R-like  
485 GRG gene I10L has not been studied, but may provide an antigenically divergent variant of P22, enabling  
486 evasion of the host immune response (18). We found KP177R was highly expressed at 16 hpi, while I10L  
487 was also expressed late, but at much lower levels. Their function is unknown, though the presence of an  
488 atypical SH2 domain indicates possible roles in signalling pathways (7,18,67).

489 MGF 110 members are among the highest expressed genes during early infection both in GRG (this study),  
490 and in BA71V (10), suggesting high importance during infection, at least in porcine macrophages and Vero  
491 cells, respectively. However, MGF 110 remains poorly characterised, and 13 orthologues were identified  
492 thus far, with numbers present varying between isolates (29). MGF 110 proteins possess cysteine-rich  
493 motifs, optimal for an oxidizing environment as found in the ER lumen or outside the cell, and MGF 110-  
494 4L (XP124L) contains a KDEL signal for retaining the protein in the endoplasmic reticulum (ER) (68). Since  
495 highly virulent isolates have few copies of these genes (for example, only 5 in the Benin 97/1 genome), it  
496 was assumed they are not importance for virulence in pigs (16), but their high expression warrant further  
497 investigation.

498 There is, good evidence that MGF 360 and 505 carry out important roles in evading the host type I  
499 interferon (IFN) response - the main host antiviral defence pathway (32). Evidence for the role of MGF  
500 360 and 505 genes in virulence from deletions in tissue-culture adapted and field attenuated isolates as  
501 well as targeted gene deletions This correlated with induction of the type I interferon response, which  
502 itself is inhibited in macrophages infected with virulent ASFV isolates (33–35). Deletions of these MGF  
503 360, and 505 genes also correlated with an increased sensitivity of ASFV replication, to pre-treatment of  
504 the macrophage cells with type I IFN (36). Thus, the MGF 360 and 505 genes have roles in inhibiting type  
505 I IFN induction and increasing sensitivity to type I IFN. However, it remains unknown if these MGF 360 and  
506 MGF 505 genes act synergistically or if some have a more important role than others type I IFN  
507 suppression. Our DESeq2 analysis did show that members of both these families showed very similar  
508 patterns of early expression (Figure 2 and Figure 3), conserved cEPM-containing promoters, and almost  
509 exclusive presence in clusters-1 (H-H), -4 (M-M), and -5 (LM-LM) (Figure 6 and Figure 7), consistent with  
510 ASFV prioritising inhibition of the host immune response during early infection.

511 An interesting pattern which emerged during our CAGE-seq analysis was the clear prevalence of iOTSSs  
512 within the ORFs, especially in MGFs (Figure 8 and Figure 9). However, it is not clear whether subsequent  
513 in-frame truncation variants generate stable proteins, nor what their function could be. Perhaps even  
514 more interesting was the discovery of 176 nORFs (including MGF 360-19R), with clear TSSs according to  
515 CAGE-seq, highlighting the power of transcriptomics to better annotate sequenced genomes. We were  
516 able to detect previously unannotated genes from other strains, and partial duplications of genes already  
517 encoded in GRG (Supplementary Table 2).

518 The increase in transcription across the ASFV genome during late infection (10), appears ubiquitous. At  
519 least 50 genes have previously been investigated in single gene expression studies using Northern blot or  
520 primer extension (for review see references (10,69). Transcripts from over two thirds of these genes were  
521 detected during late infection, and a quarter had transcripts detected during both early and late infection.  
522 Therefore, clear evidence using several techniques now support this increase in ASFV transcripts at late  
523 times post-infection. It is not entirely clear whether it is due to pervasive transcription, high mRNA stability  
524 or a combination of factors. However, there is a correlated increase in viral genome copies, potentially  
525 available as templates for pervasive transcription. The increase in genome copies is more pronounced in  
526 BA71V compared to GRG, which likewise is reflected in the increase in transcripts during late infection  
527 (Figure 4).

528 Our transcriptomic analysis of the porcine macrophage host revealed 522 genes whose expression  
529 patterns significantly changed between 5 and 16 hrs post-infection (Figure 11a) and only 20 genes were  
530 found to change from 0 and 5 hpi. In aggregate, this reflects a relatively slow host response to ASFV  
531 infection following expression of early ASFV genes. We observed mild downregulation of some genes e.g.  
532 ACTB coding for  $\beta$ -actin, eIF4A, and eIF4E (Supplementary Table 5), resembling patterns previously shown  
533 by RT-qPCR (70). The macrophage transcriptome mainly shuts down immunomodulation between 5 hpi  
534 to 16 hpi post-infection; cytokines appeared highly expressed at 5 hpi, but downregulated from 5 hpi to  
535 16 hpi. Of the 54 cytokine genes we detected, expression of thirteen was decreased: four interleukin genes  
536 (IL1A, IL1B, IL19, IL27), four pro-inflammatory chemokines (CCL24, CXCL2, CXCL5, CXCL8), and tumor  
537 necrosis factor (TNF) genes. Since inflammatory responses serve as the first line of host defense against  
538 viral infections, viruses have developed ways to neutralise host pro-inflammatory pathways. ASFV  
539 encodes a structural analog of I $\kappa$ B, A238L, which was proposed to act as a molecular off-switch for NF $\kappa$ B-  
540 targeted pro-inflammatory cytokines (62). In our study, A238L is one of the most expressed ASFV genes  
541 at 5 hpi, but significantly downregulated afterwards (Figure 2c). Accordingly, swine homologs of human  
542 NF $\kappa$ B target genes were significantly over-represented (3.8 fold) among downregulated macrophage  
543 genes (Fisher's exact p-value < 1e-5, based on human NF $\kappa$ B target genes from [https://www.bu.edu/nf-  
544 kb/gene-resources/target-genes/](https://www.bu.edu/nf-kb/gene-resources/target-genes/)). Downregulated genes include interleukins 1A, 1B, and 8, and 27 (IL1A,  
545 IL1B, CXCL8, IL27), TNF, as well as a target for common nonsteroidal anti-inflammatory drugs,  
546 prostaglandin-endoperoxide synthase 2 (PTGS2 or COX-2). Interestingly, promoters of both up- and  
547 downregulated genes contained a motif with the sequence preferentially recognised by the human p53-  
548 NF $\kappa$ B complex (71) (Supplementary Figure 2). Expression of TNF, a well-known marker gene for acute

549 immune reaction and M1 polarisation, was recorded at a high level at 0 and 5 hpi, but significantly  
550 dropped at 16 hpi. It has been already shown that ASFV inhibits transcription of TNF and other  
551 proinflammatory cytokines. (62). On the other hand, the downregulation of TNF stands in contrast to  
552 previous results from ASFV-E75 strain-infected macrophages in vitro, where TNF expression increased  
553 significantly after 6 hpi (72). Therefore, the different time courses of TNF expression induced by the  
554 moderately virulent E75 and more virulent Georgia strain may reflect different macrophage activation  
555 programs (38).

556 Four S100 family members are among the host genes that are upregulated after 5 hpi (Figure 11b)  
557 including S100A8, S100A11, S100A12, and S100A13. S100A8 and S100A12 are among the most highly  
558 expressed genes on average throughout infection. S100 proteins are calcium-binding cytosolic proteins  
559 that are released and serve as a danger signal, and stimulate inflammation (73). Once released from the  
560 cell, S100A12 and S100A8 function as endogenous agonists to bind TLR4 and induce apoptosis and  
561 autophagy in various cell types (73). S100A8 and S100A9 were also found in the RNA-seq whole blood  
562 study as the top upregulated upon infection of the pigs with Georgia 2007/1, but not of a low pathogenic  
563 ASFV isolate OURT 88/3 (40).

564 Two previous studies described global swine transcriptome changes upon ASFV infection using short read  
565 sequencing (Illumina): the RNA-seq described above (40), and a microarray study of primary swine  
566 macrophage cell cultures infected with the GRG strain, at six post-infection time points (39). Although  
567 these varied in designs and selected methods, results of these works both give some indication into the  
568 main host immune responses and ways how ASFV could evade them. The latter microarray study indicated  
569 similar suppression of inflammatory response after 16 hpi as we observed in this study, with expression  
570 of many cytokines down-regulated relatively to non-infected macrophages (39). Neither study obtained  
571 the read-depth and nucleotide resolution (obtainable with CAGE-seq), to investigate differential  
572 expression of both the virus and host, the former being especially difficult in a compact genome where  
573 transcription read-through can undermine results from classical RNA-sequencing techniques (10,74). A  
574 recent investigation into ASFV RNA transcripts using long-read based Oxford Nanopore Technologies  
575 (ONT) – provides fascinating insight into their length and read-through heterogeneity, but unfortunately  
576 lacked the coverage for in-depth host transcript analysis alongside it (75).

577 Here we have demonstrated that CAGE-seq is an exceptionally powerful tool for quantifying relative  
578 expression of viral genes across the ASFV genome, as well as making direct comparison between strains

579 for expression of shared genes, and further highlighting the importance of highly-expressed but still  
580 functionally uncharacterised viral genes. CAGE-seq conveniently circumvents the issue in compact viral  
581 genomes like those of ASFV and VACV, of transcripts reading through into downstream genes which  
582 cannot be distinguished from classical short-read RNA-seq (10,40,76). Furthermore, it enables us to  
583 effectively annotate genome-wide the 5' ends of capped viral transcripts, and thus TSSs of viral genes, and  
584 subsequently their temporal promoters. We have now expanded on promoter motifs we previously  
585 described (Figure 7), to identify 5 clusters of genes (Figure 6), with distinct patterns of expression. Three  
586 of these clusters (-1: high to high levels, -4: mid to mid, and -5 low-mid to low-mid) have slightly differing  
587 promoters, with a highly conserved core EPM. This is akin to the early gene promoter of VACV (74) for  
588 VETF recognition and early gene transcription initiation (77,78). We have found late genes can be  
589 categorised into two types that either increase from low to extremely high expression levels (e. g. p72-  
590 encoding B646L) in cluster-2, or from low to medium expression levels in cluster 3 (e. g VETF-encoding  
591 genes). The promoters of these genes show resemblance to the eukaryotic TATA-box (79) or the BA71V  
592 LPM (10), respectively. Our analysis additionally shows the potential for a variety of non-pTSSs: alternative  
593 ones used for different times in infection, ioTSSs which could generate in-frame truncation variants of  
594 ORFs, sense or antisense transcripts relative to annotated ORFs, and finally TSSs generating nORFs, which  
595 predominantly have no known homologs.

596 In summary, it is becoming increasingly clear that the transcriptomic landscape of ASFV during infection  
597 is far more complex than originally anticipated. Much of this raises further questions about the basal  
598 mechanisms underlying ASFV transcription and how it is regulated over the infection time course. Which  
599 subsets of initiation factors enable the RNAPs to recognise early and late promoters? Does ASFV include  
600 intermediate genes, and what factors enables their expression? What is the molecular basis of the  
601 pervasive transcription during late infection? The field of ASFV transcription has been understudied and  
602 underappreciated, and considering the severe threat that ASF poses for the global food system and -food  
603 security, we now need to step up and focus our attention and resources to study the fundamental biology  
604 of ASFV to develop effective antiviral drugs and vaccines.

## 605 Methodology [2057 words]

### 606 GRG-Infection of Macrophages and RNA-extraction

607 Primary porcine alveolar macrophage cells collected from two animals following approval by the local  
608 Animal Welfare and Ethical Review Board at The Pirbright Institute. Cells were seeded in 6-well plates  
609 ( $2 \times 10^6$  cells/well) with RPMI medium (with GlutaMAX), supplemented with 10% Pig serum and 100 IU/ml  
610 penicillin, 100  $\mu$ g/ml streptomycin. They were infected as 2 replicate wells for 5 hpi or 16 hpi with a  
611 multiplicity of infection (MOI) of 5 of the ASFV Georgia 2007/1 strain, while uninfected cells were seeded  
612 in parallel as a control. Total RNA was extracted according to manufacturer's instructions for extraction  
613 with Trizol Lysis Reagent (Thermo Fisher Scientific and the subsequent RNAs were resuspended in 50  $\mu$ l  
614 RNase-free water and DNase-treated (Turbo DNafree kit, Invitrogen). RNA quality was assessed via  
615 Bioanalyzer (Agilent 2100). 5  $\mu$ g of each sample was ethanol precipitated before sending to CAGE-seq  
616 (Kabushiki Kaisha DNAFORM, Japan). Samples were named as follows: uninfected cells (C1-0 hpi and C2-  
617 0h), at 5 hpi post-infection (samples G1-5h and G2-5h), and at 16 hpi post-infection (G3-16h and G4-16h).

### 618 CAGE-sequencing and Mapping to GRG and *Sus scrofa* Genomes

619 Library preparation and CAGE-sequencing of RNA samples was carried out by CAGE-seq (Kabushiki Kaisha  
620 DNAFORM, Japan). Library preparation produced single-end indexed cDNA libraries for sequencing: in  
621 brief, this included reverse transcription with random primers, oxidation and biotinylation of 5' mRNA  
622 cap, followed by RNase ONE treatment removing RNA not protected in a cDNA-RNA hybrid. Two rounds  
623 of cap-trapping using Streptavidin beads, washed away uncapped RNA-cDNA hybrids. Next, RNase ONE  
624 and RNase H treatment degraded any remaining RNA, and cDNA strands were subsequently released from  
625 the Streptavidin beads and quality assessed via Bioanalyzer. Single strand index linker and 3' linker was  
626 ligated to released cDNA strands, and primer containing Illumina Sequencer Priming site was used for  
627 second strand synthesis. Samples were sequenced using the Illumina NextSeq 500 platform producing 76  
628 bp reads. FastQC (80) analysis was carried out on all FASTQ files at Kabushiki Kaisha DNAFORM and CAGE-  
629 seq reads showed consistent read quality across their read-length, therefore, were mapped in their  
630 entirety to the GRG genome (FR682468.1) in our work using Bowtie2 (81), and *Sus scrofa*  
631 (GCF\_000003025.6) genome with HISAT2 (81,82) by Kabushiki Kaisha DNAFORM.



## 632 Transcription Start Site-mapping Across Viral GRG Genome

633 CAGE-seq mapped sample BAM files were converted to BigWig (BW) format with BEDtools (83)  
634 genomecov, to produce per-strand BW files of 5' read ends. Stranded BW files were input for TSS-  
635 prediction in RStudio (84) with Bioconductor (85) package CAGEfightR (86). Genomic feature locations  
636 were imported as a TxDb object from FR682468.1 genome gene feature file (GFF3). CAGEfightR was used  
637 to quantify the CAGE reads mapping at base pair resolution to the GRG genome - at CAGE TSSs, separately  
638 for the 5 hpi and 16 hpi replicates. TSS values were normalized by tags-per-million for each sample,  
639 pooled, and only TSSs supported by presence in both replicates were kept. TSSs were assigned to clusters,  
640 if within 25 bp of one another, filtering out pooled, RPM-normalized TSS counts below 25 bp for 5 hpi  
641 samples, or 50 bp for 16 hpi, and assigned a 'thick' value as the highest TSS peak within that cluster. A  
642 higher cut-off for 16 hpi was used to minimise the extra noise of pervasive transcription observed during  
643 late infection (10). TSS clusters were assigned to annotated FR682468.1 ORFs using BEDtools intersect, if  
644 its highest point ('thick' region) was located within 500 bp upstream of an ORF, 'CDS' if within the ORF,  
645 'NA' if no annotated ORF was within these regions. Multiple TSSs located within 500 bp of ORFs were split  
646 into subsets: 'Primary' cluster subset contained either the highest scoring CAGEfightR cluster or the  
647 highest scoring manually-annotated peak (when manual ORF corrections necessary), and the highest peak  
648 coordinate was defined as the primary TSS (pTSS) for an ORF. Further clusters associated with these ORFs  
649 were classified as 'non-primary', with their highest peak as a non-primary TSS (npTSS). If the strongest TSS  
650 location was intra-ORF, without any TSSs located upstream of the ORF, then the ORF was manually re-  
651 defined as starting from the next ATG downstream.

## 652 DESeq2 Differential Expression Analysis of GRG Genes

653 For analysing differential expression with the CAGE-seq dataset, a GFF was created with BEDtools  
654 extending from the pTSS coordinate, 25 bp upstream and 75 bp downstream, however, in cases of  
655 alternating pTSSs this region was defined as 25 bp upstream of the most upstream pTSS and 75 bp  
656 downstream of the most downstream pTSS. HTSeq-count (87) was used to count reads mapping to  
657 genomic regions described above for both the RNA- and CAGE-seq sample datasets. The raw read counts  
658 were then used to analyse differential expression across these regions between the time-points using  
659 DESeq2 (default normalisation described by Love et al. (41)) and those regions showing changes with an  
660 adjusted p-value (padj) of <0.05 were considered significant. A caveat of this 'early' or 'late' definition is  
661 that it is a binary definition of whether a gene is up- or downregulated between conditions (time-points),

662 relative to the background read depth of reads which map to the genome in question. Further analysis of  
663 ASFV genes used their characterised or predicted functions, from the VOCS tool database  
664 (<https://4virology.net/>) (88,89) entries for the GRG genome.

#### 665 [Quantification of viral genome copies at different time points of infection](#)

666 Porcine lung macrophages were seeded and infected as described above. *Vero* cells were similarly  
667 cultured in 6-well plates in DMEM medium supplemented with 10% Fetal calf serum, 100 IU/ml penicillin  
668 and 100 µg/ml streptomycin, when semi-confluent they were infected with MOI 5 of Ba71V. Immediately  
669 after infection (after 1h adsorption period, considered '0 hpi), or at 5 hpi, and 16 hpi, the supernatant was  
670 removed and nucleic acids were extracted using the Qiap viral RNA kit (Qiagen) and quantified using a  
671 NanoDrop spectrophotometer (ThermoFisher Scientific). For quantification of viral genome copy  
672 equivalents, 50 ng of each nucleic acid sample was used in qPCR with primers and probe targeting the  
673 viral capsid gene B646L. As previously described (90), standard curve quantification qPCR was carried out  
674 on a Mx3005P system (Agilent Technologies) using the primers CTGCTCATGGTATCAATCTTATCGA and  
675 GATACCACAAGATC(AG)GCCGT and probe 5'-(6-carboxyfluorescein [FAM])-  
676 CCACGGGAGGAATACCAACCCAGTG-3'-(6-carboxytetramethylrhodamine [TAMRA]).

#### 677 [Analysis of mRNA levels by RT-PCR and quantitative real time PCR \(qPCR\)](#)

678 RNA from GRG or Ba71V infected macrophages, or *Vero* cells respectively, or from uninfected cell controls,  
679 was collected at the different time points post-infection with Trizol, as described above. RNA was reverse  
680 transcribed (800 ng RNA per sample) using SuperScript III First-Strand Synthesis System for RT-PCR and  
681 random hexamers (Invitrogen). For PCR, cDNAs were diluted 1:20 with nuclease free water and 1 µl each  
682 sample was amplified in a total volume of 20 µl using Platinum™ Green Hot Start PCR Master Mix  
683 (Invitrogen) and 200 nM of each primer. Annealing temperatures were tested for each primer pair in  
684 gradient PCR to determine the one optimal for amplification. Supplementary Table 7a shows the primers  
685 used for each gene target, the amplicon size, PCR reaction conditions, and NCBI accession numbers for  
686 sequences used primer design. PCRs were then performed with limited cycles of amplification to have a  
687 semi-quantitative comparison of transcript abundance between infection timepoints (by not reaching the  
688 maximum product amplification plateau). Amplification products were viewed using 1.5% agarose gel  
689 electrophoresis.

690 C315R transcript levels were assessed by qPCR, using housekeeping gene glyceraldehyde-3-phosphate  
691 dehydrogenase (GAPDH) expression was used for normalisation. Primer details and the qPCR

692 amplification program are shown in Supplementary Table 7b (GAPDH primers used for *Vero* cells were  
693 previously published by Melchjorsen et al., 2009 (91)). Primers were used at 250 nM concentration with  
694 Brilliant III Ultra-Fast SYBR® Green QPCR Master Mix (Agilent 600882), 1 µl cDNA in 20 µl (1:20) total  
695 reaction volumes, and qPCRs carried out in Mx3005P system (Agilent Technologies). Similar amplification  
696 efficiencies (97-102%) for all primers had been observed upon amplification of serially diluted cDNA  
697 samples, and the relative expression at each timepoint of infection was calculated using the formula  $2^{\Delta Ct}$   
698 ( $2^{Ct_{GAPDH} - Ct_{C315R}}$ ).

### 699 ASFV Promoter Motif Analysis

700 DESeq2 results were used to categorise ASFV genes into two simple sub-classes: early; 87 genes  
701 downregulated from early to late infection and late; the 78 upregulated from early to late infection. These  
702 characterised gene pTSSs were then pooled with the nORF pTSSs, and sequences upstream and  
703 downstream of the pTSS were extracted from the GRG genome in FASTA format using BEDtools.  
704 Sequences 35 bp upstream of and including the pTSSs were analysed using MEME software ([http://meme-  
705 suite.org](http://meme-<br/>705 suite.org)) (92), searching for 5 motifs with a maximum width of 20 nt and 27 nt, respectively (other  
706 settings at default). The input for MEME motif searches included sequences upstream of 134 early pTSSs  
707 (87 genes and 47 nORFs) for early promoter searching, while 234 late pTSSs (78 genes and 156 nORFs)  
708 were used to search for late promoters. For analysis of conserved motifs upstream of the five clusters  
709 described in Figure 6a-b, sequences were extracted in the same manner as above, but grouped according  
710 to their cluster. MEME motif searches were carried out for sequences in each cluster, searching for 3  
711 motifs, 5-36 bp in length, with zero or one occurrence per sequence ('zoops' mode).

### 712 Identification of TSSs by rapid amplification of cDNA ends - 5'RACE

713 For 5'RACE of GRG genes DP146L, pNG4 and CP204L we designed the gene specific primers (GSP) shown  
714 in Supplementary Table 7c, and used the kit: "5' RACE System for Rapid Amplification of cDNA Ends"  
715 (Invitrogen), according to manufacturer instructions. Briefly, 150 ng RNA from either 5 hpi or 16 hpi  
716 macrophages (one of the replicate RNA samples used for CAGE-seq) was used for cDNA synthesis with  
717 GSP1 primers, followed by degradation of the mRNA template with RNase Mix, and column purification  
718 of the cDNA. A homopolymeric tail was added to the cDNA 3'ends with Terminal deoxynucleotidyl  
719 transferase, which allowed PCR amplification with an "Abridged Anchor Primer" (AAP) from the 5'RACE  
720 kit and a nested GSP2 primer. A second PCR was performed over an aliquot of the previous, with 5'RACE  
721 "Abridged Universal amplification Primer" (AUAP), and an additional nested primer GSP3, except for pNG4

722 where GSP2 was re-used due to the small predicted size of the amplicon. Platinum™ Green Hot Start PCR  
723 Master Mix (Invitrogen) was used for PCR and products were run in 2% agarose gel electrophoresis (see  
724 Supplementary Table 7c for expected sizes). Efficient recovery of cDNA from the purification column  
725 requires a product of at least 200 bases and therefore, due to the small predicted size of pNG4 transcripts  
726 its GSP1 primer was extended at the 5' end with an irrelevant non-annealing sequence of extra 50 nt in  
727 order to create a longer recoverable product.

## 728 CAGE-seq Analysis for the *Sus scrofa* Genome

729 Analyses of TSS-mapping, gene expression and motif searching with CAGE-seq reads mapped to the *Sus*  
730 *scrofa* 11.1 genome were carried out by DNAFORM (Yokohama, Kanagawa, Japan). The 5' ends of CAGE-  
731 seq reads were utilised as input for the Reclu pipeline (93) with a cutoff of 0.1 RPM, and irreproducible  
732 discovery rate of 0.1. 37,159 total CAGE-seq peaks could be identified, of which around half (16,720)  
733 match unique CAGE peaks previously identified by Roberts et al. (59) (i.e. within 100 nt of any of them).  
734 TSSs for 9,384 protein-coding genes (out of 21,288) were annotated de novo from the CAGE-defined TSSs  
735 (Supplementary Table 4).

736 Protein-coding genes with annotated TSSs (9,384 out of 21,288) were then subjected to differential  
737 expression analysis. CAGE-seq reads were summed up over all TSSs assigned to a gene and compared  
738 between two time points using edgeR (94) at maximum false discovery rate of 0.05. The full list of host  
739 genes with annotated promoters together with their estimated expression levels is provided in  
740 Supplementary Table 5. Gene set enrichment analysis was performed with the DAVID 6.8 Bioinformatics  
741 Resources (95), using best BLASTP (96) human hits (from the UniProt (97) reference human proteome).  
742 The 9,331 genes with human homologs were used as a background, and functional annotations of the  
743 four major expression response groups (late/early up-/down-regulated genes) were clustered in DAVID  
744 6.8 using medium classification stringency. MEME motif searches were conducted for promoters of four  
745 differentially regulated subsets of host genes, as defined in Figure 11a. Promoters sequences were  
746 extended 1000 bp upstream and 200 bp downstream of TSSs, searched with MEME (max. 10 motifs, max.  
747 100 bp long, on a given strand only, zero or one site per sequence,  $E < 0.01$ ), and then compared against  
748 known vertebrate DNA motifs with Tomtom ( $p$ -value  $< 0.01$ ).

## 749 Data Availability

750 Raw sequencing data are available on the Sequence Read Archive (SRA) database under BioProject:  
751 PRJNA739166. This also includes CAGE-seq data aligned to the ASFV-GRG (FR682468.1 *Sus scrofa*  
752 (GCF\_000003025.6) genomes (see methods above) in BAM format. Available for review via the link below:  
753 <https://dataview.ncbi.nlm.nih.gov/object/PRJNA739166?reviewer=390lg85cohvh81lto5gr1d22n>

## 754 Acknowledgements

755 Research in the RNAP laboratory at UCL is funded by a Wellcome Investigator Award in Science  
756 ‘Mechanisms and Regulation of RNAP transcription’ to FW (WT 207446/Z/17/Z). GC is funded by the  
757 Wellcome Trust ISMB 4-year PhD programme ‘Macromolecular machines: interdisciplinary training  
758 grounds for structural, computational and chemical biology’ (WT 108877/B/15/Z). Research in the ASFV  
759 group at The Pirbright Institute is funded by the Biotechnology and Biological Sciences Research Council  
760 (BBS/E/I/0007030 and BBS/E/I/0007031). The authors are grateful to all members of the RNAP lab and  
761 Tine Arnvig for critical reading of the manuscript.

## 762 References

- 763 1. Gogin A, Gerasimov V, Malogolovkin A, Kolbasov D. African swine fever in the North Caucasus  
764 region and the Russian Federation in years 2007-2012. *Virus Res.* 2013 Apr 1;173(1):198–203.
- 765 2. Zhou X, Li N, Luo Y, Liu Y, Miao F, Chen T, et al. Emergence of African Swine Fever in China, 2018.  
766 *Transbound Emerg Dis.* 2018 Dec 1;65(6):1482–4.
- 767 3. Alonso C, Borca M, Dixon L, Revilla Y, Rodriguez F, Escribano JM, et al. ICTV Virus Taxonomy Profile:  
768 *Asfarviridae*. *J Gen Virol.* 2018 May 1;99(5):613–4.
- 769 4. Koonin E V., Yutin N. Origin and evolution of eukaryotic large nucleo-cytoplasmic DNA viruses.  
770 *Intervirology.* 2010;53(5):284–92.
- 771 5. Yutin N, Koonin E V. Hidden evolutionary complexity of Nucleo-Cytoplasmic Large DNA viruses of  
772 eukaryotes. *Virol J.* 2012 Aug 14;9(1):161.
- 773 6. Broyles SS. Vaccinia virus transcription. *J Gen Virol.* 2003 Sep 1;84(9):2293–303.
- 774 7. Alejo A, Matamoros T, Guerra M, Andrés G. A proteomic atlas of the African swine fever virus  
775 particle. *J Virol.* 2018 Sep 5;JVI.01293-18.

- 776 8. Salas ML, Kuznar J, Viñuela E. Polyadenylation, methylation, and capping of the RNA synthesized  
777 in vitro by African swine fever virus. *Virology*. 1981 Sep 1;113(2):484–91.
- 778 9. Rodríguez JM, Salas ML. African swine fever virus transcription. Vol. 173, *Virus Research*. Elsevier  
779 B.V.; 2013. p. 15–28.
- 780 10. Cackett G, Matelska D, Sýkora M, Portugal R, Malecki M, Bähler J, et al. The African Swine Fever  
781 Virus Transcriptome. *J Virol*. 2020 Feb 19;94(9).
- 782 11. Iyer LM, Balaji S, Koonin E V., Aravind L. Evolutionary genomics of nucleo-cytoplasmic large DNA  
783 viruses. *Virus Res*. 2006 Apr;117(1):156–84.
- 784 12. Yutin N, Wolf YI, Raoult D, Koonin E V. Eukaryotic large nucleo-cytoplasmic DNA viruses: clusters  
785 of orthologous genes and reconstruction of viral genome evolution. *Virol J*. 2009 Dec 17;6(3):223.
- 786 13. Rodríguez JM, Moreno LT, Alejo A, Lacasta A, Rodríguez F, Salas ML. Genome Sequence of African  
787 Swine Fever Virus BA71, the Virulent Parental Strain of the Nonpathogenic and Tissue-Culture  
788 Adapted BA71V. Munderloh UG, editor. *PLoS One*. 2015 Nov 30;10(11):e0142889.
- 789 14. Yáñez RJ, Rodríguez JM, Nogal ML, Yuste L, Enríquez C, Rodríguez JF, et al. Analysis of the complete  
790 nucleotide sequence of African swine fever virus. *Virology*. 1995 Apr 1;208(1):249–78.
- 791 15. Dixon LK, Chapman DAG, Netherton CL, Upton C. African swine fever virus replication and  
792 genomics. *Virus Res*. 2013;173(1):3–14.
- 793 16. Chapman DAG, Tcherepanov V, Upton C, Dixon LK. Comparison of the genome sequences of non-  
794 pathogenic and pathogenic African swine fever virus isolates. *J Gen Virol*. 2008 Feb 1;89(2):397–  
795 408.
- 796 17. Forth JH, Forth LF, King J, Groza O, Hübner A, Olesen AS, et al. A deep-sequencing workflow for the  
797 fast and efficient generation of high-quality African swine fever virus whole-genome sequences.  
798 *Viruses*. 2019;11(9).
- 799 18. Chapman DAG, Darby AC, da Silva M, Upton C, Radford AD, Dixon LK. Genomic analysis of highly  
800 virulent Georgia 2007/1 isolate of African swine fever virus. *Emerg Infect Dis*. 2011 Apr;17(4):599–  
801 605.
- 802 19. Farlow J, Donduashvili M, Kokhraidze M, Kotorashvili A, Vepkhvadze NG, Kotaria N, et al. Intra-  
28

- 803 epidemic genome variation in highly pathogenic African swine fever virus (ASFV) from the country  
804 of Georgia. *Virology*. 2018 Dec 14;15(1):190.
- 805 20. Mazur-Panasiuk N, Woźniakowski G, Niemczuk K. The first complete genomic sequences of African  
806 swine fever virus isolated in Poland. *Sci Rep*. 2019 Dec 1;9(1):3–5.
- 807 21. Granberg F, Torresi C, Oggiano A, Malmberg M, Iscaro C, De Mia GM, et al. Complete genome  
808 sequence of an African swine fever virus isolate from Sardinia, Italy. *Genome Announc*.  
809 2016;4(6):1220–36.
- 810 22. Wang Z, Jia L, Li J, Liu H, Liu D. Pan-Genomic Analysis of African Swine Fever Virus. *Virologica Sinica*.  
811 Science Press; 2019. p. 1–4.
- 812 23. Rowlands RJ, Michaud V, Heath L, Hutchings G, Oura C, Vosloo W, et al. African swine fever virus  
813 isolate, Georgia, 2007. *Emerg Infect Dis*. 2008 Dec;14(12):1870–4.
- 814 24. Zhao D, Liu R, Zhang X, Li F, Wang J, Zhang J, et al. Replication and virulence in pigs of the first  
815 African swine fever virus isolated in China. *Emerg Microbes Infect*. 2019 Jan 1;8(1):438–47.
- 816 25. Zani L, Forth JH, Forth L, Nurmoja I, Leidenberger S, Henke J, et al. Deletion at the 5'-end of Estonian  
817 ASFV strains associated with an attenuated phenotype. *Sci Reports* 2018 81. 2018 Apr 25;8(1):1–  
818 11.
- 819 26. Gallardo C, Nurmoja I, Soler A, Delicado V, Simón A, Martín E, et al. Evolution in Europe of African  
820 swine fever genotype II viruses from highly to moderately virulent. *Vet Microbiol*. 2018 Jun  
821 1;219:70–9.
- 822 27. Pershin A, Shevchenko I, Igolkin A, Zhukov I, Mazloun A, Aronova E, et al. A Long-Term Study of  
823 the Biological Properties of ASF Virus Isolates Originating from Various Regions of the Russian  
824 Federation in 2013–2018. *Vet Sci* 2019, Vol 6, Page 99. 2019 Dec 6;6(4):99.
- 825 28. E S, Z Z, Z W, X H, X Z, L W, et al. Emergence and prevalence of naturally occurring lower virulent  
826 African swine fever viruses in domestic pigs in China in 2020. *Sci China Life Sci*. 2021 May  
827 1;64(5):752–65.
- 828 29. Imbery J, Upton C. Organization of the multigene families of African Swine Fever Virus. *Fine Focus*.  
829 2017;3(2):155–70.



- 830 30. Netherton CL, Connell S, Benfield CTO, Dixon LK. The Genetics of Life and Death: Virus-Host  
831 Interactions Underpinning Resistance to African Swine Fever, a Viral Hemorrhagic Disease. *Front*  
832 *Genet.* 2019 May 3;10(MAY):402.
- 833 31. Keßler C, Forth JH, Keil GM, Mettenleiter TC, Blome S, Karger A. The intracellular proteome of  
834 African swine fever virus. *Sci Rep.* 2018 Oct 2;8(1):14714.
- 835 32. Randall RE, Goodbourn S. Interferons and viruses: An interplay between induction, signalling,  
836 antiviral responses and virus countermeasures. Vol. 89, *Journal of General Virology*. Microbiology  
837 Society; 2008. p. 1–47.
- 838 33. Afonso RCL, Piccone ME, Zaffuto KM, Neilan J, Kutish GF, Lu Z, et al. African swine fever virus  
839 multigene family 360 and 530 genes affect host interferon response. *J Virol.* 2004;78:1858–64.
- 840 34. Neilan JG, Zsak L, Lu Z, Kutish GF, Afonso CL, Rock DL. Novel Swine Virulence Determinant in the  
841 Left Variable Region of the African Swine Fever Virus Genome. *J Virol.* 2002 Apr 1;76(7):3095–104.
- 842 35. Reis AL, Abrams CC, Goatley LC, Netherton C, Chapman DG, Sanchez-Cordon P, et al. Deletion of  
843 African swine fever virus interferon inhibitors from the genome of a virulent isolate reduces  
844 virulence in domestic pigs and induces a protective response. *Vaccine.* 2016 Sep 7;34(39):4698–  
845 705.
- 846 36. Golding JP, Goatley L, Goodbourn S, Dixon LK, Taylor G, Netherton CL. Sensitivity of African swine  
847 fever virus to type I interferon is linked to genes within multigene families 360 and 505. *Virology.*  
848 2016 Jun 1;493:154–61.
- 849 37. Mosser DM, Edwards JP. Exploring the full spectrum of macrophage activation. Vol. 8, *Nature*  
850 *Reviews Immunology*. NIH Public Access; 2008. p. 958–69.
- 851 38. Roy S, Schmeier S, Arner E, Alam T, Parihar SP, Ozturk M, et al. Redefining the transcriptional  
852 regulatory dynamics of classically and alternatively activated macrophages by deepCAGE  
853 transcriptomics. *Nucleic Acids Res.* 2015;43(14):6969–82.
- 854 39. Zhu JJ, Ramanathan P, Bishop EA, O'Donnell V, Gladue DP, Borca M V. Mechanisms of African swine  
855 fever virus pathogenesis and immune evasion inferred from gene expression changes in infected  
856 swine macrophages. *PLoS One.* 2019;14(11).

- 857 40. Jaing C, Rowland RRR, Allen JE, Certoma A, Thissen JB, Bingham J, et al. Gene expression analysis  
858 of whole blood RNA from pigs infected with low and high pathogenic African swine fever viruses.  
859 Sci Rep. 2017 Dec 31;7(1):10115.
- 860 41. Love MI, Huber W, Anders S. Moderated estimation of fold change and dispersion for RNA-seq  
861 data with DESeq2. Genome Biol. 2014 Dec 5;15(12):550.
- 862 42. Hammond JM, Kerr SM, Smith GL, Dixon LK. An African swine fever virus gene with homology to  
863 DNA ligases. Nucleic Acids Res. 1992 Jun 11;20(11):2667–71.
- 864 43. Reis AL, Goatley LC, Jabbar T, Sanchez-Cordon PJ, Netherton CL, Chapman DAG, et al. Deletion of  
865 the African Swine Fever Virus Gene DP148R Does Not Reduce Virus Replication in Culture but  
866 Reduces Virus Virulence in Pigs and Induces High Levels of Protection against Challenge. J Virol.  
867 2017 Dec 15;91(24).
- 868 44. Yang Z, Martens CA, Bruno DP, Porcella SF, Moss B. Pervasive initiation and 3'-end formation of  
869 poxvirus postreplicative RNAs. J Biol Chem. 2012 Sep 7;287(37):31050–60.
- 870 45. Frouco G, Freitas FB, Coelho J, Leitão A, Martins C, Ferreira F. DNA-Binding Properties of African  
871 Swine Fever Virus pA104R, a Histone-Like Protein Involved in Viral Replication and Transcription. J  
872 Virol. 2017;91(12).
- 873 46. Conesa A, Madrigal P, Tarazona S, Gomez-Cabrero D, Cervera A, McPherson A, et al. A survey of  
874 best practices for RNA-seq data analysis. Genome Biol. 2016 Jan 26;17:13.
- 875 47. García-Escudero R, Viñuela E. Structure of African Swine Fever Virus Late Promoters: Requirement  
876 of a TATA Sequence at the Initiation Region. J Virol. 2000 Sep 1;74(17):8176–82.
- 877 48. Bailey TL, Boden M, Buske FA, Frith M, Grant CE, Clementi L, et al. MEME SUITE: tools for motif  
878 discovery and searching. Nucleic Acids Res. 2009 Jul 1;37(Web Server):W202–8.
- 879 49. Gupta S, Stamatoyannopoulos JA, Bailey TL, Noble W. Quantifying similarity between motifs.  
880 Genome Biol. 2007 Feb 26;8(2):R24.
- 881 50. Rodríguez JM, Salas ML, Viñuela E. Intermediate class of mRNAs in African swine fever virus. J Virol.  
882 1996 Dec;70(12):8584–9.
- 883 51. Kim DE, Chivian D, Baker D. Protein structure prediction and analysis using the Robetta server.

- 884 Nucleic Acids Res. 2004;32(WEB SERVER ISS.):W526–31.
- 885 52. J Z, Y Z, T C, J Y, H Y, L W, et al. Deletion of the L7L-L11L Genes Attenuates ASFV and Induces  
886 Protection against Homologous Challenge. *Viruses*. 2021 Feb 1;13(2).
- 887 53. Gabler F, Nam SZ, Till S, Mirdita M, Steinegger M, Söding J, et al. Protein Sequence Analysis Using  
888 the MPI Bioinformatics Toolkit. *Curr Protoc Bioinforma*. 2020 Dec 1;72(1).
- 889 54. Kang Y, Xu J, Liu Y, Sun J, Sun D, Hu Y, et al. Crystal structure of the cell corpse engulfment protein  
890 CED-2 in *Caenorhabditis elegans*. *Biochem Biophys Res Commun*. 2011 Jul 1;410(2):189–94.
- 891 55. Kaneko T, Huang H, Zhao B, Li L, Liu H, Voss CK, et al. Loops govern SH2 domain specificity by  
892 controlling access to binding pockets. *Sci Signal*. 2010 May 4;3(120).
- 893 56. Baylis SA, Banham AH, Vydellingum S, Dixon LK, Smith GL. African swine fever virus encodes a serine  
894 protein kinase, which is packaged into virions. *J Virol*. 1993;67:4549–56.
- 895 57. Aravind L, Koonin E V. DNA polymerase beta-like nucleotidyltransferase superfamily: identification  
896 of three new families, classification and evolutionary history. *Nucleic Acids Res*. 1999 Apr  
897 1;27(7):1609–18.
- 898 58. Priet S, Lartigue A, Debart F, Claverie JM, Abergel C. mRNA maturation in giant viruses: Variation  
899 on a theme. *Nucleic Acids Res*. 2015;43(7):3776–88.
- 900 59. Robert C, Kapetanovic R, Beraldi D, Watson M, Archibald AL, Hume DA. Identification and  
901 annotation of conserved promoters and macrophage-expressed genes in the pig genome. *BMC*  
902 *Genomics*. 2015 Nov 18;16(1).
- 903 60. Ganchi PA, Sun SC, Greene WC, Ballard DW. A novel NF-kappa B complex containing p65  
904 homodimers: implications for transcriptional control at the level of subunit dimerization. *Mol Cell*  
905 *Biol*. 1993 Dec;13(12):7826–35.
- 906 61. Dixon LK, Abrams CC, Bowick G, Goatley LC, Kay-Jackson PC, Chapman D, et al. African swine fever  
907 virus proteins involved in evading host defence systems. In: *Veterinary Immunology and*  
908 *Immunopathology*. 2004. p. 117–34.
- 909 62. Powell PP, Dixon LK, Parkhouse RM. An IkappaB homolog encoded by African swine fever virus  
910 provides a novel mechanism for downregulation of proinflammatory cytokine responses in host

- 911           macrophages. *J Virol.* 1996;70(12):8527–33.
- 912   63.   Granja AG, Sánchez EG, Sabina P, Fresno M, Revilla Y. African swine fever virus blocks the host cell  
913           antiviral inflammatory response through a direct inhibition of PKC-theta-mediated p300  
914           transactivation. *J Virol.* 2009 Jan 15;83(2):969–80.
- 915   64.   Takeya T, Hanafusa H. DNA sequence of the viral and cellular src gene of chickens. II. Comparison  
916           of the src genes of two strains of avian sarcoma virus and of the cellular homolog. *J Virol.*  
917           1982;44(1):12–8.
- 918   65.   Kaneko T, Stogios PJ, Ruan X, Voss C, Evdokimova E, Skarina T, et al. Identification and  
919           characterization of a large family of superbinding bacterial SH2 domains. *Nat Commun.* 2018 Dec  
920           1;9(1).
- 921   66.   Krug PW, Holinka LG, O’Donnell V, Reese B, Sanford B, Fernandez-Sainz I, et al. The progressive  
922           adaptation of a georgian isolate of African swine fever virus to vero cells leads to a gradual  
923           attenuation of virulence in swine corresponding to major modifications of the viral genome. *J Virol.*  
924           2015 Feb 15;89(4):2324–32.
- 925   67.   Camacho A, Viñuela E. Protein p22 of African swine fever virus: An early structural protein that is  
926           incorporated into the membrane of infected cells. *Virology.* 1991 Mar 1;181(1):251–7.
- 927   68.   Netherton C, Rouiller I, Wileman T. The subcellular distribution of multigene family 110 proteins  
928           of African swine fever virus is determined by differences in C-terminal KDEL endoplasmic reticulum  
929           retention motifs. *J Virol.* 2004 Apr 1;78(7):3710–21.
- 930   69.   Cackett G, Sýkora M, Werner F. Transcriptome view of a killer: African swine fever virus. Vol. 48,  
931           Biochemical Society Transactions. Portland Press Ltd; 2020. p. 1569–81.
- 932   70.   Quintas A, Pérez-Núñez D, Sánchez EG, Nogal ML, Hentze MW, Castelló A, et al. Characterization  
933           of the African Swine Fever Virus Decapping Enzyme during Infection. Jung JU, editor. *J Virol.* 2017  
934           Dec 15;91(24):e00990-17.
- 935   71.   Kunsch C, Ruben SM, Rosen CA. Selection of optimal kappa B/Rel DNA-binding motifs: interaction  
936           of both subunits of NF-kappa B with DNA is required for transcriptional activation. *Mol Cell Biol.*  
937           1992 Oct;12(10):4412–21.

- 938 72. Gómez del Moral M, Ortuño E, Fernández-Zapatero P, Alonso F, Alonso C, Ezquerro A, et al. African  
939 Swine Fever Virus Infection Induces Tumor Necrosis Factor Alpha Production: Implications in  
940 Pathogenesis. *J Virol*. 1999 Mar 1;73(3):2173–80.
- 941 73. Xia C, Braunstein Z, Toomey AC, Zhong J, Rao X. S100 proteins as an important regulator of  
942 macrophage inflammation. Vol. 8, *Frontiers in Immunology*. Frontiers Media S.A.; 2018.
- 943 74. Yang Z, Bruno DP, Martens CA, Porcella SF, Moss B. Simultaneous high-resolution analysis of  
944 vaccinia virus and host cell transcriptomes by deep RNA sequencing. *Proc Natl Acad Sci U S A*. 2010  
945 Jun 22;107(25):11513–8.
- 946 75. Olasz F, Tombácz D, Torma G, Csabai Z, Moldován N, Dörmő Á, et al. Short and Long-Read  
947 Sequencing Survey of the Dynamic Transcriptomes of African Swine Fever Virus and the Host Cells.  
948 *Front Genet*. 2020 Jul 28;11:2020.02.27.967695.
- 949 76. Yang Z, Bruno DP, Martens CA, Porcella SF, Moss B. Genome-Wide Analysis of the 5' and 3' Ends of  
950 Vaccinia Virus Early mRNAs Delineates Regulatory Sequences of Annotated and Anomalous  
951 Transcripts. *J Virol*. 2011 Jun;85(12):5897–909.
- 952 77. Gershon PD, Moss B. Early transcription factor subunits are encoded by vaccinia virus late genes.  
953 *Proc Natl Acad Sci U S A*. 1990 Jun 1;87(11):4401–5.
- 954 78. Li J, Broyles SS. Recruitment of vaccinia virus RNA polymerase to an early gene promoter by the  
955 viral early transcription factor. *J Biol Chem*. 1993;268(4):2773–80.
- 956 79. Patikoglou GA, Kim JL, Sun L, Yang SH, Kodadek T, Burley SK. TATA element recognition by the TATA  
957 box-binding protein has been conserved throughout evolution. *Genes Dev*. 1999 Dec  
958 15;13(24):3217–30.
- 959 80. Andrews S. FastQC A Quality Control tool for High Throughput Sequence Data. Babraham, England:  
960 Babraham Bioinformatics;
- 961 81. Langmead B, Salzberg SL. Fast gapped-read alignment with Bowtie 2. *Nat Methods*. 2012 Apr  
962 4;9(4):357–9.
- 963 82. Kim D, Langmead B, Salzberg SL. HISAT: a fast spliced aligner with low memory requirements. *Nat*  
964 *Methods*. 2015 Apr 9;12(4):357–60.

- 965 83. Quinlan AR, Hall IM. BEDTools: a flexible suite of utilities for comparing genomic features.  
966 Bioinformatics. 2010 Mar 15;26(6):841–2.
- 967 84. RStudio Team. RStudio: Integrated Development for R. Boston, MA: RStudio, Inc; 2016.
- 968 85. Huber W, Carey VJ, Gentleman R, Anders S, Carlson M, Carvalho BS, et al. Orchestrating high-  
969 throughput genomic analysis with Bioconductor. Nat Methods. 2015 Feb 1;12(2):115–21.
- 970 86. Thodberg M, Thieffry A, Vitting-Seerup K, Andersson R, Sandelin A. CAGEfightR: Cap Analysis of  
971 Gene Expression (CAGE) in R/Bioconductor. bioRxiv. 2018 Apr 28;310623.
- 972 87. Anders S, Pyl PT, Huber W. HTSeq--a Python framework to work with high-throughput sequencing  
973 data. Bioinformatics. 2015 Jan 15;31(2):166–9.
- 974 88. Upton C, Slack S, Hunter AL, Ehlers A, Roper RL, Rock DL. Poxvirus orthologous clusters: toward  
975 defining the minimum essential poxvirus genome. J Virol. 2003 Jul 1;77(13):7590–600.
- 976 89. Tu SL, Upton C. Bioinformatics for Analysis of Poxvirus Genomes. In: Methods in Molecular Biology.  
977 Humana Press Inc.; 2019. p. 29–62.
- 978 90. DP K, SM R, GH H, SS G, PJ W, LK D, et al. Development of a TaqMan PCR assay with internal  
979 amplification control for the detection of African swine fever virus. J Virol Methods. 2003  
980 Jan;107(1):53–61.
- 981 91. J M, H K, R C, J R, S M, SR P, et al. Differential regulation of the OASL and OAS1 genes in response  
982 to viral infections. J Interferon Cytokine Res. 2009 Apr 1;29(4):199–207.
- 983 92. Bailey TL, Elkan C. Fitting a mixture model by expectation maximization to discover motifs in  
984 biopolymers. Proceedings Int Conf Intell Syst Mol Biol. 1994;2:28–36.
- 985 93. Ohmiya H, Vitezic M, Frith MC, Itoh M, Carninci P, Forrest ARR, et al. RECLU: A pipeline to discover  
986 reproducible transcriptional start sites and their alternative regulation using capped analysis of  
987 gene expression (CAGE). BMC Genomics. 2014 Apr 25;15(1):269.
- 988 94. Robinson MD, McCarthy DJ, Smyth GK. edgeR: A Bioconductor package for differential expression  
989 analysis of digital gene expression data. Bioinformatics. 2009 Nov 11;26(1):139–40.
- 990 95. Huang DW, Sherman BT, Lempicki RA. Systematic and integrative analysis of large gene lists using

- 991 DAVID bioinformatics resources. *Nat Protoc.* 2009;4(1):44–57.
- 992 96. Altschul SF, Gish W, Miller W, Myers EW, Lipman DJ. Basic local alignment search tool. *J Mol Biol.*  
993 1990 Oct 5;215(3):403–10.
- 994 97. Bateman A. UniProt: A worldwide hub of protein knowledge. *Nucleic Acids Res.* 2019 Jan  
995 8;47(D1):D506–15.
- 996 98. Ramírez F, Dünder F, Diehl S, Grüning BA, Manke T. deepTools: a flexible platform for exploring  
997 deep-sequencing data. *Nucleic Acids Res.* 2014 Jul;42(Web Server issue):W187–91.
- 998 99. Crooks GE, Hon G, Chandonia JM, Brenner SE. WebLogo: A sequence logo generator. *Genome Res.*  
999 2004 May 12;14(6):1188–90.
- 1000 100. Grant CE, Bailey TL, Noble WS. FIMO: scanning for occurrences of a given motif. *Bioinformatics.*  
1001 2011 Apr 1;27(7):1017–8.
- 1002 101. McCarthy DJ, Chen Y, Smyth GK. Differential expression analysis of multifactor RNA-Seq  
1003 experiments with respect to biological variation. *Nucleic Acids Res.* 2012 May 1;40(10):4288–97.
- 1004 102. Benjamini Y, Hochberg Y. Controlling the False Discovery Rate: A Practical and Powerful Approach  
1005 to Multiple Testing. *J R Stat Soc Ser B.* 1995 Jan;57(1):289–300.
- 1006 103. Yates AD, Achuthan P, Akanni W, Allen J, Allen J, Alvarez-Jarreta J, et al. Ensembl 2020. *Nucleic*  
1007 *Acids Res.* 2020 Jan 1;48(D1):D682–8.
- 1008 104. Wheeler DL, Church DM, Federhen S, Lash AE, Madden TL, Pontius JU, et al. Database resources of  
1009 the National Center for Biotechnology. *Nucleic Acids Res.* 2003 Jan 1;31(1):28–33.
- 1010
- 1011 Figures



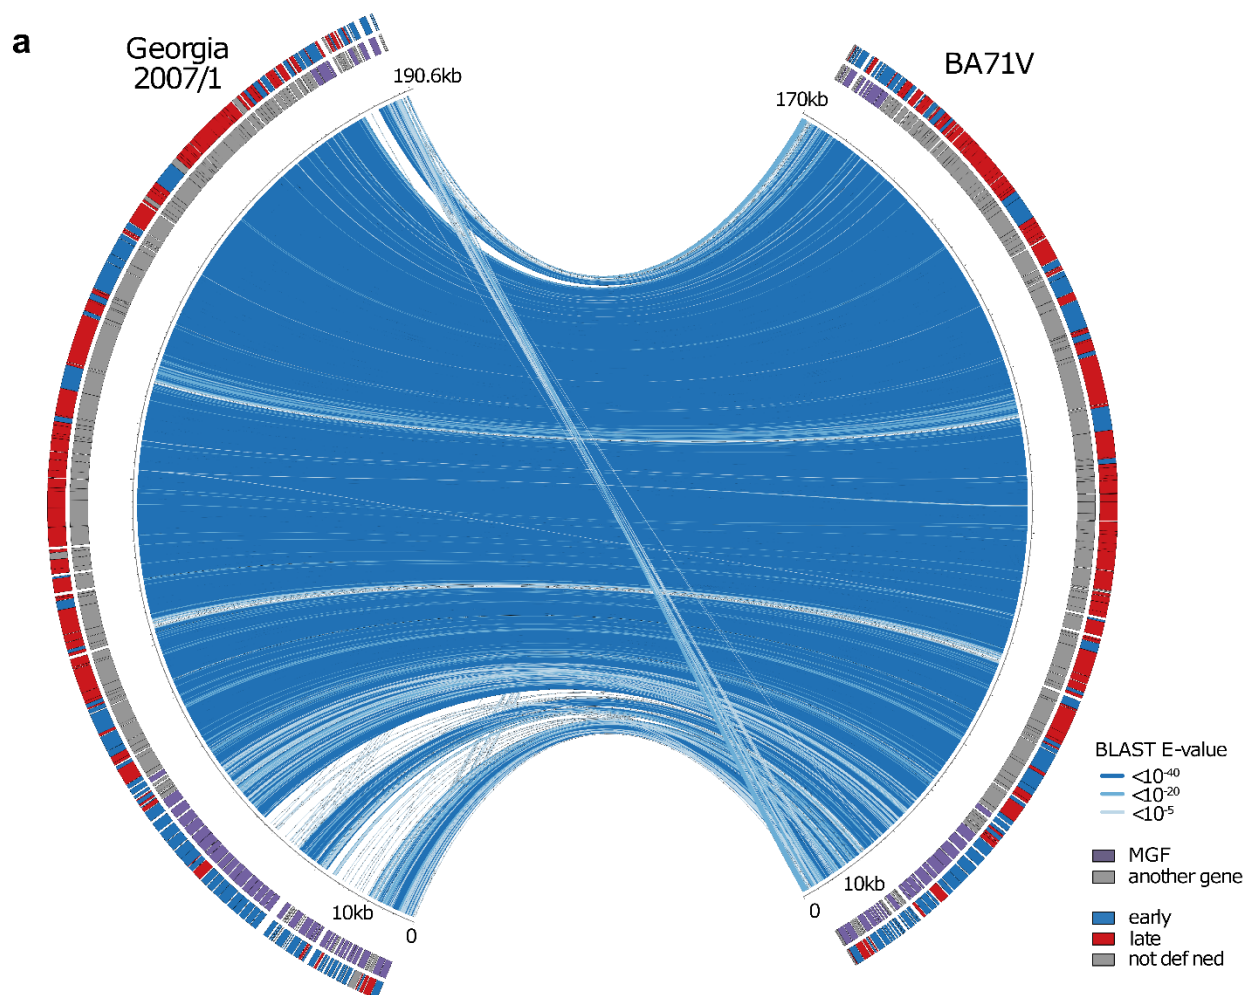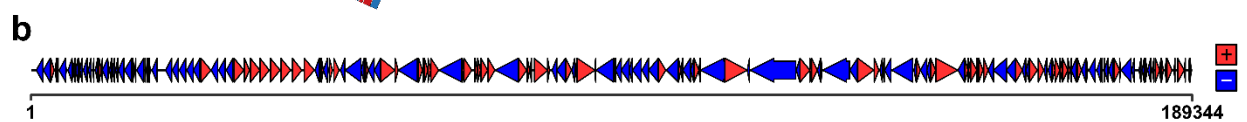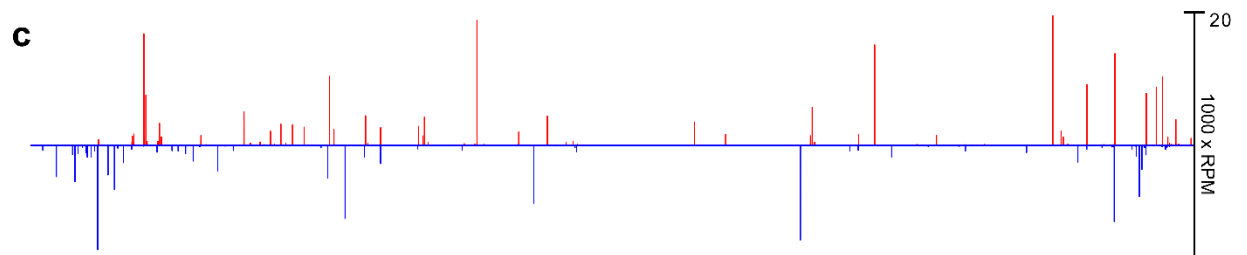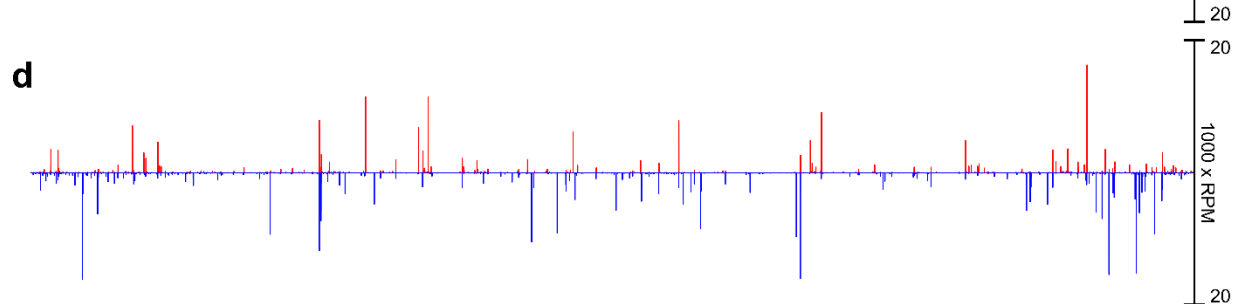

1013 Figure 1. Functional genome annotation of ASFV GRG. (a) Comparison between the genomes of BA71V  
1014 and GRG, generated with Circos (<http://circos.ca/>). Blue lines represent sequence conservation (Blast E-  
1015 values per 100 nt). The Inner ring represents genes defined as MGF members (purple), and all others  
1016 (grey). The outer ring shows annotated genes which we have defined as early or late according to  
1017 downregulation or upregulation between 5 hpi and 16 hpi from DESeq2 analysis. (b) 189 GRG annotated  
1018 ORFs are represented as arrows and coloured according to strand. CAGE-seq peaks across the GRG  
1019 genome at 5 hpi (c) and 16 hpi (d), normalized coverage reads per million mapped reads (RPM) of 5' ends  
1020 of CAGE-seq reads. The coverage was capped at 20000 RPM for visualisation, though multiple peaks  
1021 exceeded this. DeepTools (98), was used to convert bam files to bigwig format and imported into Rstudio  
1022 for visual representation via packages ggplot, ggbio, rtracklayer, and gggenes was used to generate the  
1023 ORF map in (b).

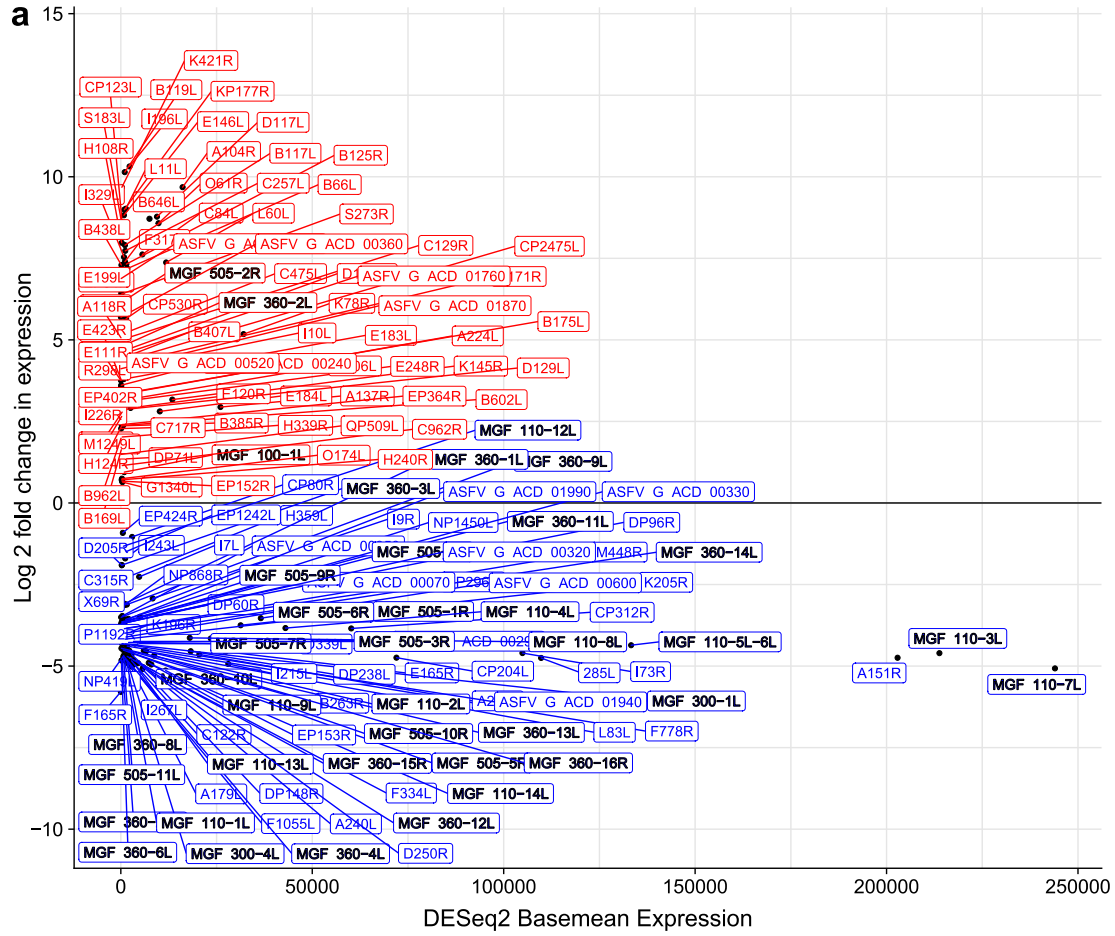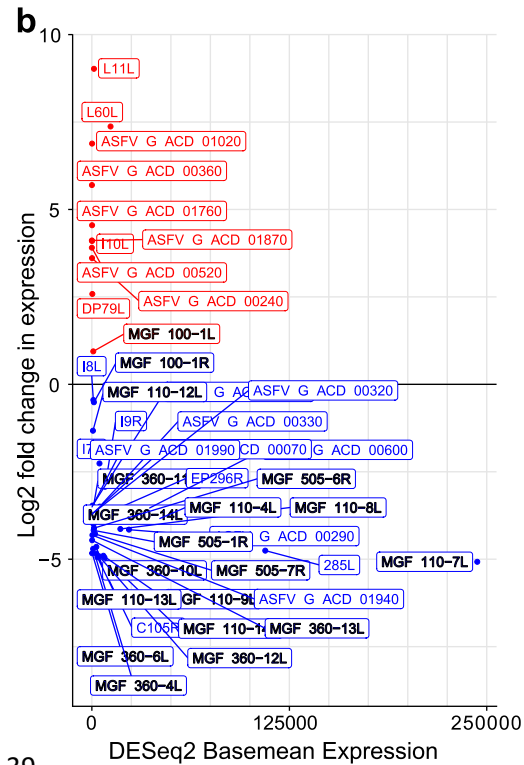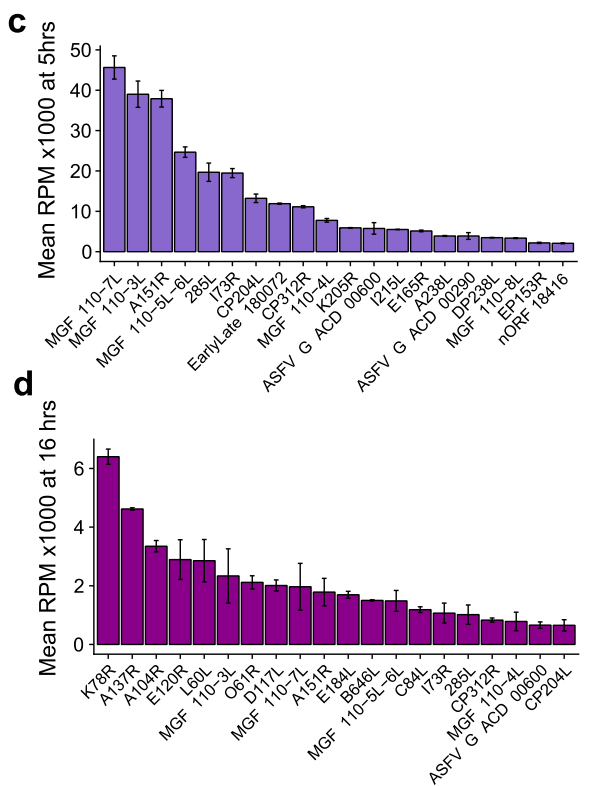

1025 Figure 2. Summary of GRG gene expression (a) Expression profiles for 164 genes for which we annotated  
 1026 pTSSs from CAGE-seq and which showed significant differential expression. Log<sub>2</sub> fold change and  
 1027 basemean expression values were from DESeq2 analysis of raw counts (see methods). Genes are coloured  
 1028 according to their log<sub>2</sub> fold change in expression as red (positive: upregulated from 5 hpi to 16 hpi) or  
 1029 blue (negative: downregulated). MGFs are emphasised with a black outline to highlight their  
 1030 overrepresentation in the group of downregulated genes. (b) Expression profiles for 43 genes (excluding  
 1031 nORFs) only detected as being expressed in GRG and not BA71V, format as in (a). (c) Expression (RPM) of  
 1032 20 highest-expressed genes at 5 hpi, error bars represent standard deviation between replicates. (d)  
 1033 Expression (RPM) of 20 highest-expressed genes at 16 hpi pi, error bars are the standard deviation  
 1034 between replicates.

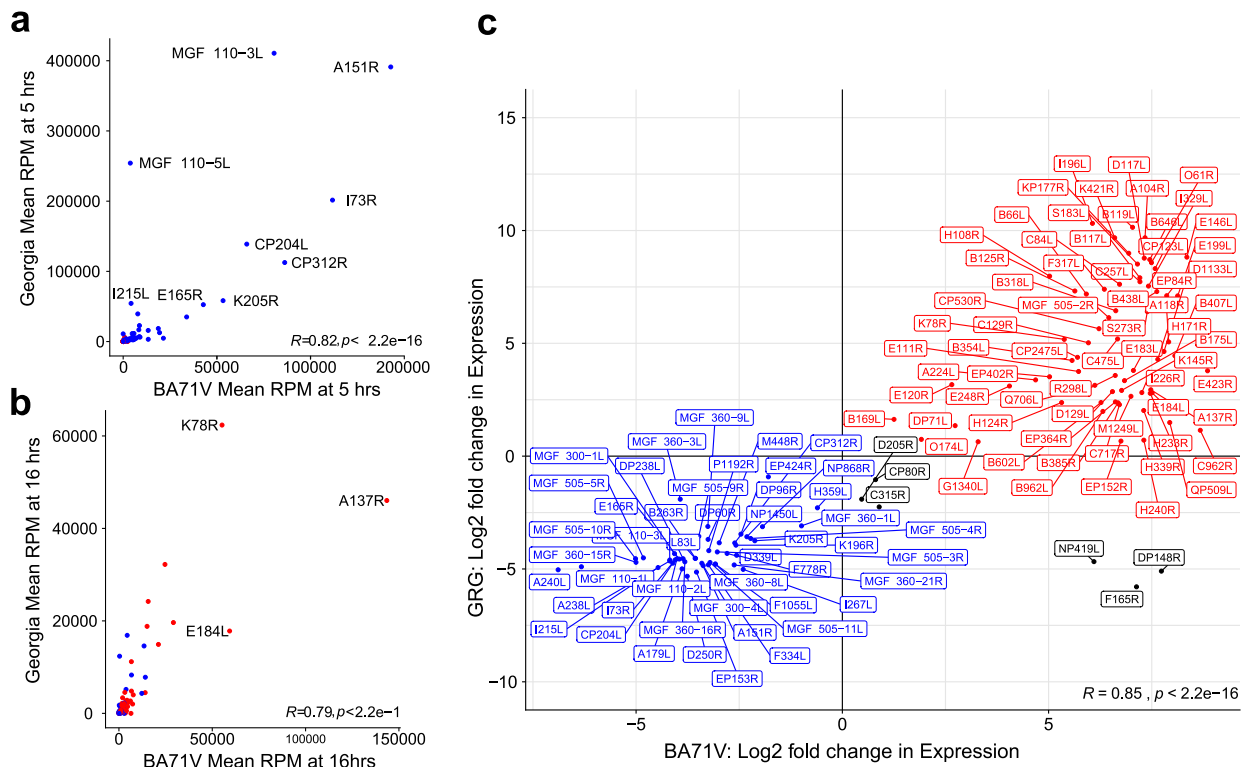

1035  
 1036 Figure 3. Comparison of gene expression profiles for genes shared between GRG and BA71V. Scatter plots  
 1037 of mean RPM across replicates for shared genes at 5 hpi (a) and 16 hpi (b), coloured according to whether  
 1038 genes show significant downregulation (blue), or upregulation (red) according to DESeq2 analysis in GRG.  
 1039 In both (b) and (c) genes with RPM values above 40000 RPM in either strain are labelled. (c) Comparison  
 1040 of log<sub>2</sub> fold change in expression values of genes in GRG and BA71V, in blue are downregulated (early)

1041 genes in both strains, red are upregulated (late) genes in both strains, while the genes which disagree in  
1042 their differential expression patterns between strains are in black. R represents the Pearson Correlation  
1043 coefficient for each individual plot in (a), (b), and (c).

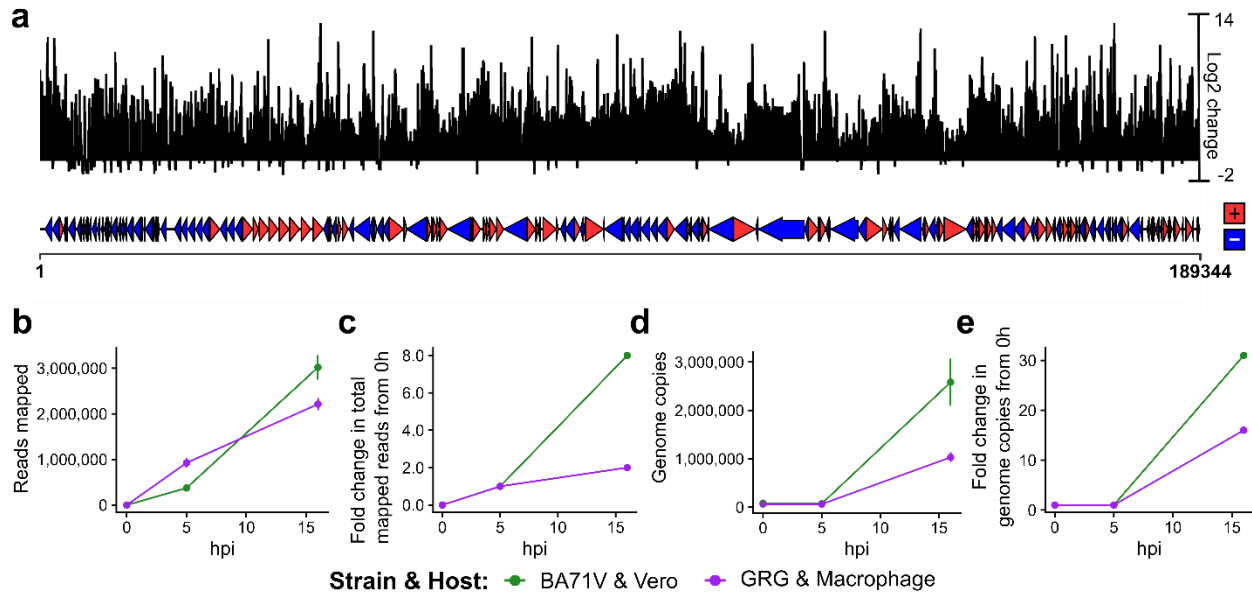

1044  
1045 Figure 4. Increase in virus genome copy number mRNA levels during late infection. (a) The ‘log<sub>2</sub> change’  
1046 represents log<sub>2</sub> of the ratio of CAGE-seq reads (normalised per million mapped reads) at 16 hpi vs. 5 hpi  
1047 per nucleotide across the genome. Alignment comparisons and calculations were done with deepTools  
1048 (98). (b) Replicate means of CAGE-seq reads mapped to either the BA71V (green) or GRG (purple) genomes  
1049 throughout infection. (c) Fold change in CAGE-seq reads during infection, calculated via mean value across  
1050 2 replicates, but with the assumption number of reads at 0 hpi is 0, therefore dividing by values from 5  
1051 hpi. (d) Change in genome copies from DNA qPCR of B646L gene, dividing by value at 0 hpi to represent  
1052 ‘1 genome copy per infected cell’. (e) Fold change in genome copies present at 0 hpi , 5 hpi and 16 hpi  
1053 from qPCR in (d). (d) calculated as for (c), but with actual vales for 0 hpi.

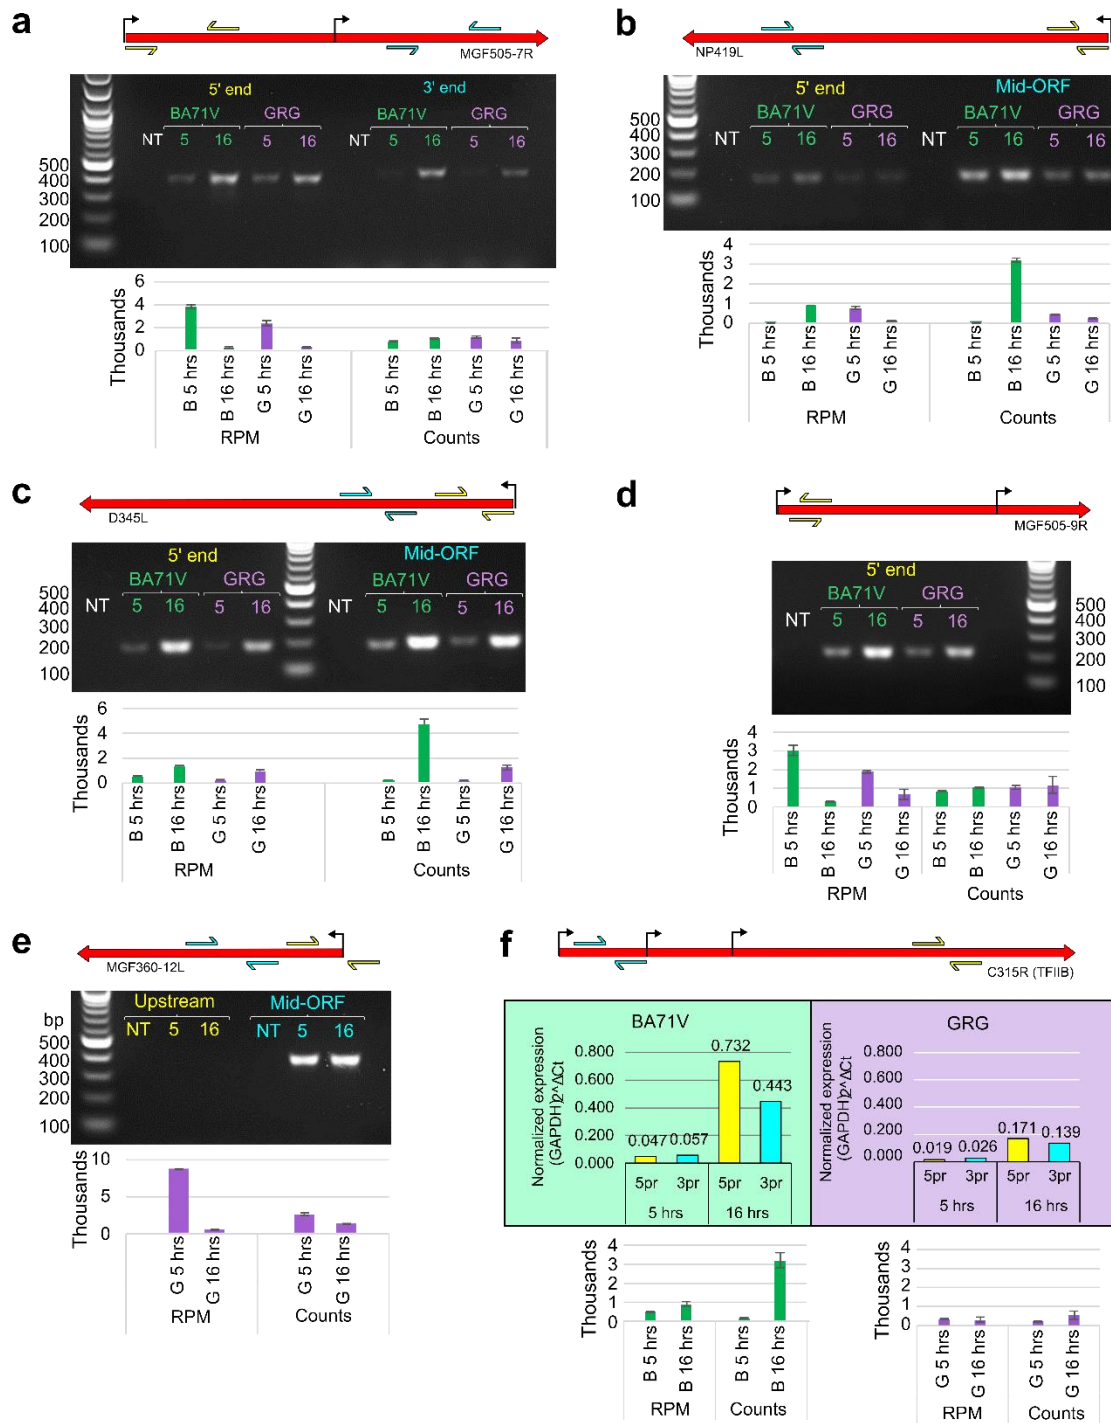

1054

1055 Figure 5. RT-PCR results of genes for comparison to CAGE-seq data from (a) MGF505-7R, (b) NP419L, (c)  
 1056 D345L, (d) MGF360-12L, (e) MGF505-9R, and (f) qRT-PCR results of C315R (ASFV-TFIIB). (NT = no template  
 1057 control). For each panel at the top is a diagrammatic representation of each gene's TSSs (bent arrow,  
 1058 including both pTSS and iOTSSs), annotated ORF (red arrow), and arrow pairs in cyan or yellow represent

1059 the primers used for PCR (see methods for primer sequences). Beneath each PCR results are bar charts  
 1060 representing the CAGE-seq results as either normalised (mean RPM) or raw (mean read counts) data, error  
 1061 bars show the range of values from each replicate.

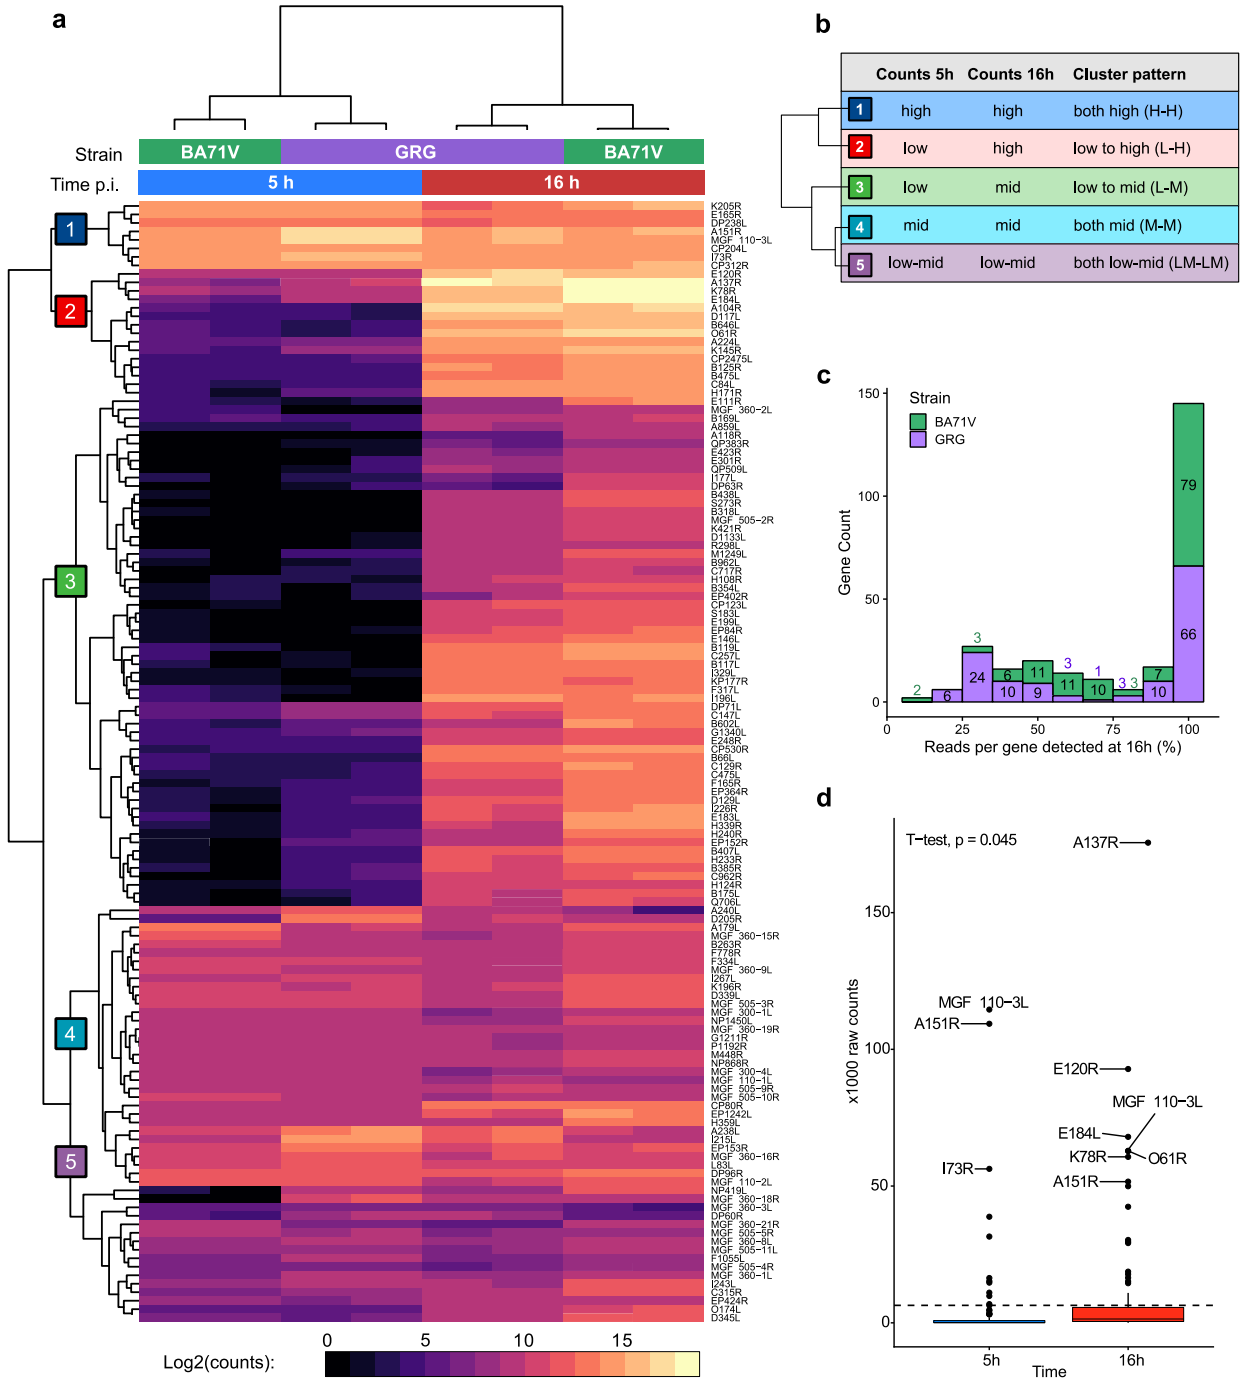

1062



1063 Figure 6. Comparison of the raw read counts for genes shared between BA71V and GRG. (a) clustered  
 1064 heatmap representation of raw counts for genes shared between BA71V and GRG, generated with  
 1065 phemap. (b) broad patterns represented by genes in the 5 clusters indicated in (a). (c) histogram  
 1066 showing the percentage of the total raw reads per gene which are detected at 16 hpi vs. 5 hpi post-  
 1067 infection, and comparing the distribution of percentages between GRG and BA71V. (d) Mean read counts  
 1068 from GRG at 5 hpi vs 16 hpi replicates, showing a significant increase (T-test, p-value: 0.045) from 5 hpi to  
 1069 16 hpi.

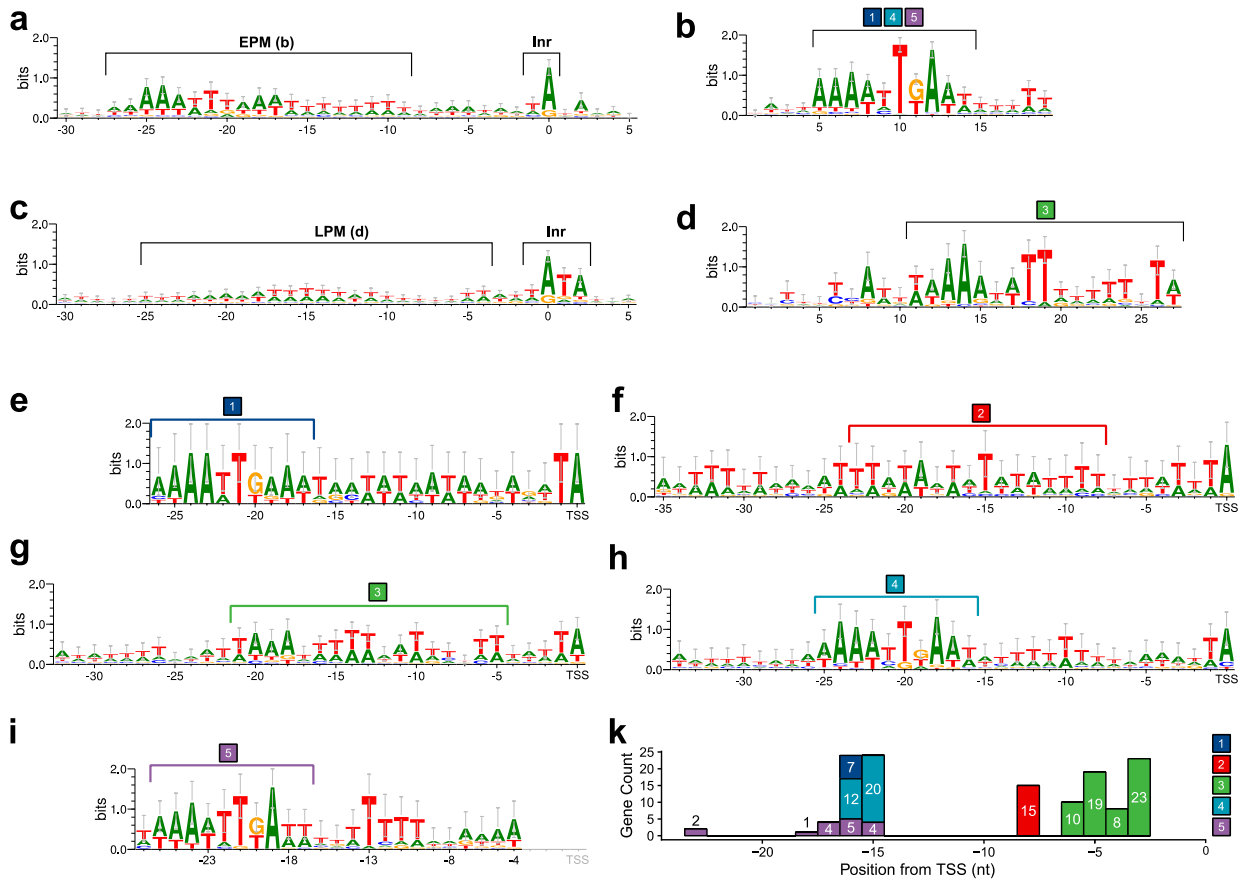

1070

1071 Figure 7. Promoter motifs and initiators detected in early and late ASFV GRG TSSs including alternative  
 1072 TSSs and those for nORFs. (a) Consensus of 30 bp upstream and 5 bp downstream of all 134 early TSSs  
 1073 including nORFs, with the conserved EPM (10) and Inr annotated. (b) 30 bp upstream and 5 bp  
 1074 downstream of all 234 late gene and nORFs TSSs, with the LPM and Inr annotated (c) The conserved EPM  
 1075 detected via MEME motif search of 35 bp upstream for 133 for 134 early TSSs (E-value: 3.1e-069). The  
 1076 conserved LPM detected via MEME motif search of 35 bp upstream for 46 for 234 late gene TSSs (E-value:  
 1077 2.6e-003). The locations of the EPM shown in (b) and LPM shown in (d) are annotated with brackets in (a)

1078 and (b), respectively. Motifs detected via MEME search of 35 bp upstream of genes in clusters from Figure  
1079 6: cluster 1 (7 genes, E-value:  $9.1e-012$ ), 2 (15 genes, E-value:  $2.6e-048$ ), 3 (60 genes, E-value:  $1.0e-167$ ),  
1080 4 (32 genes, E-value:  $4.7e-105$ ), 5 (16 genes, E-value:  $5.7e-036$ ), are shown in e-i, respectively. For ease of  
1081 comparison, (e), (g), (i) and (f), (h) are aligned at TSS position. All motifs were generated using Weblogo 3  
1082 (99). (k) shows the distribution of MEME motif-end distances, from last nt (in coloured bracket), to their  
1083 respective downstream TSSs.

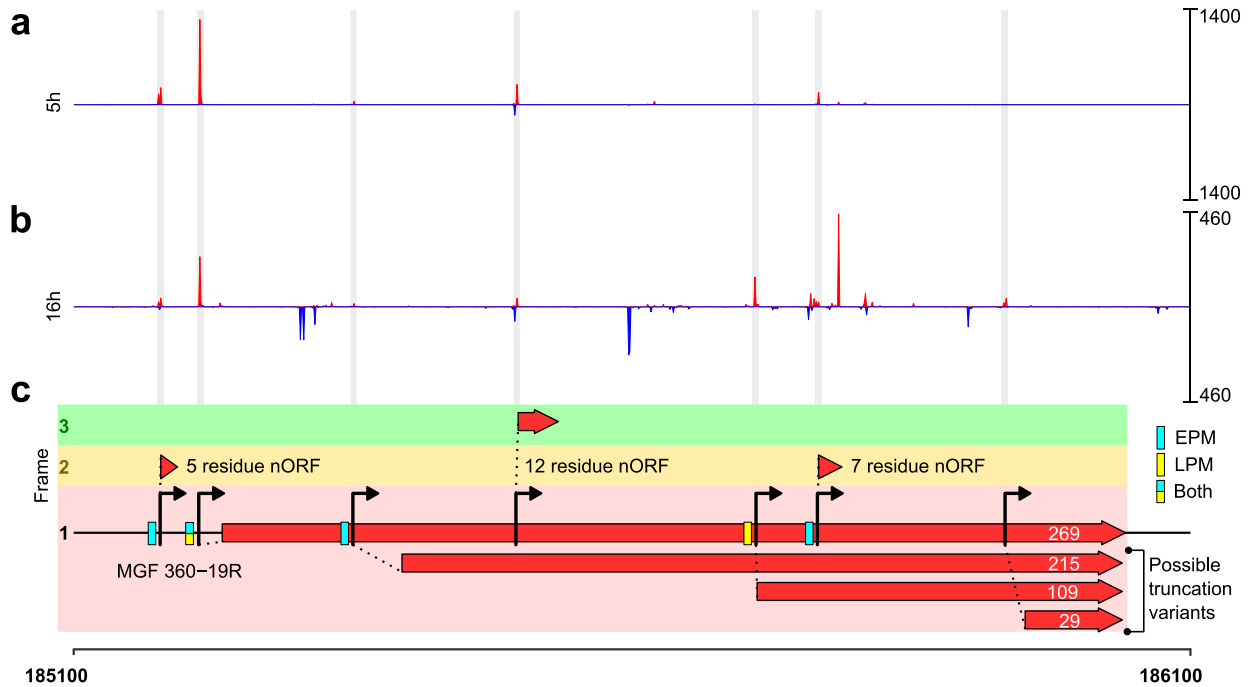

1084  
1085 Figure 8. The TSSs of MGF 360-19R. Panels (a) 5 hpi and (b) 16 hpi show CAGE-seq 5' end data from these  
1086 time-points, in red are reads from the plus strand and blue from the minus strand, the RPM scales are on  
1087 the right. (c) TSSs are annotated with arrows if they can generate a minimum of 5 residue-ORF  
1088 downstream, and grey bars indicate where they are located on the CAGE-seq coverage in (a) and (b). ORFs  
1089 identified downstream of TSSs are shown as red arrows (visualized with R package gggenes), including  
1090 three short nORFs out of frame with MGF 360-19R. Also shown are three in-frame truncation variants,  
1091 from TSSs detected inside the full-length MGF 360-19R 269-residue ORF, downstream of its pTSS at  
1092 185213. Blue or yellow boxes upstream of TSSs indicate whether the EPM or LPM (respectively) could be  
1093 detected within 35 nt upstream of the TSS using FIMO searching (100).

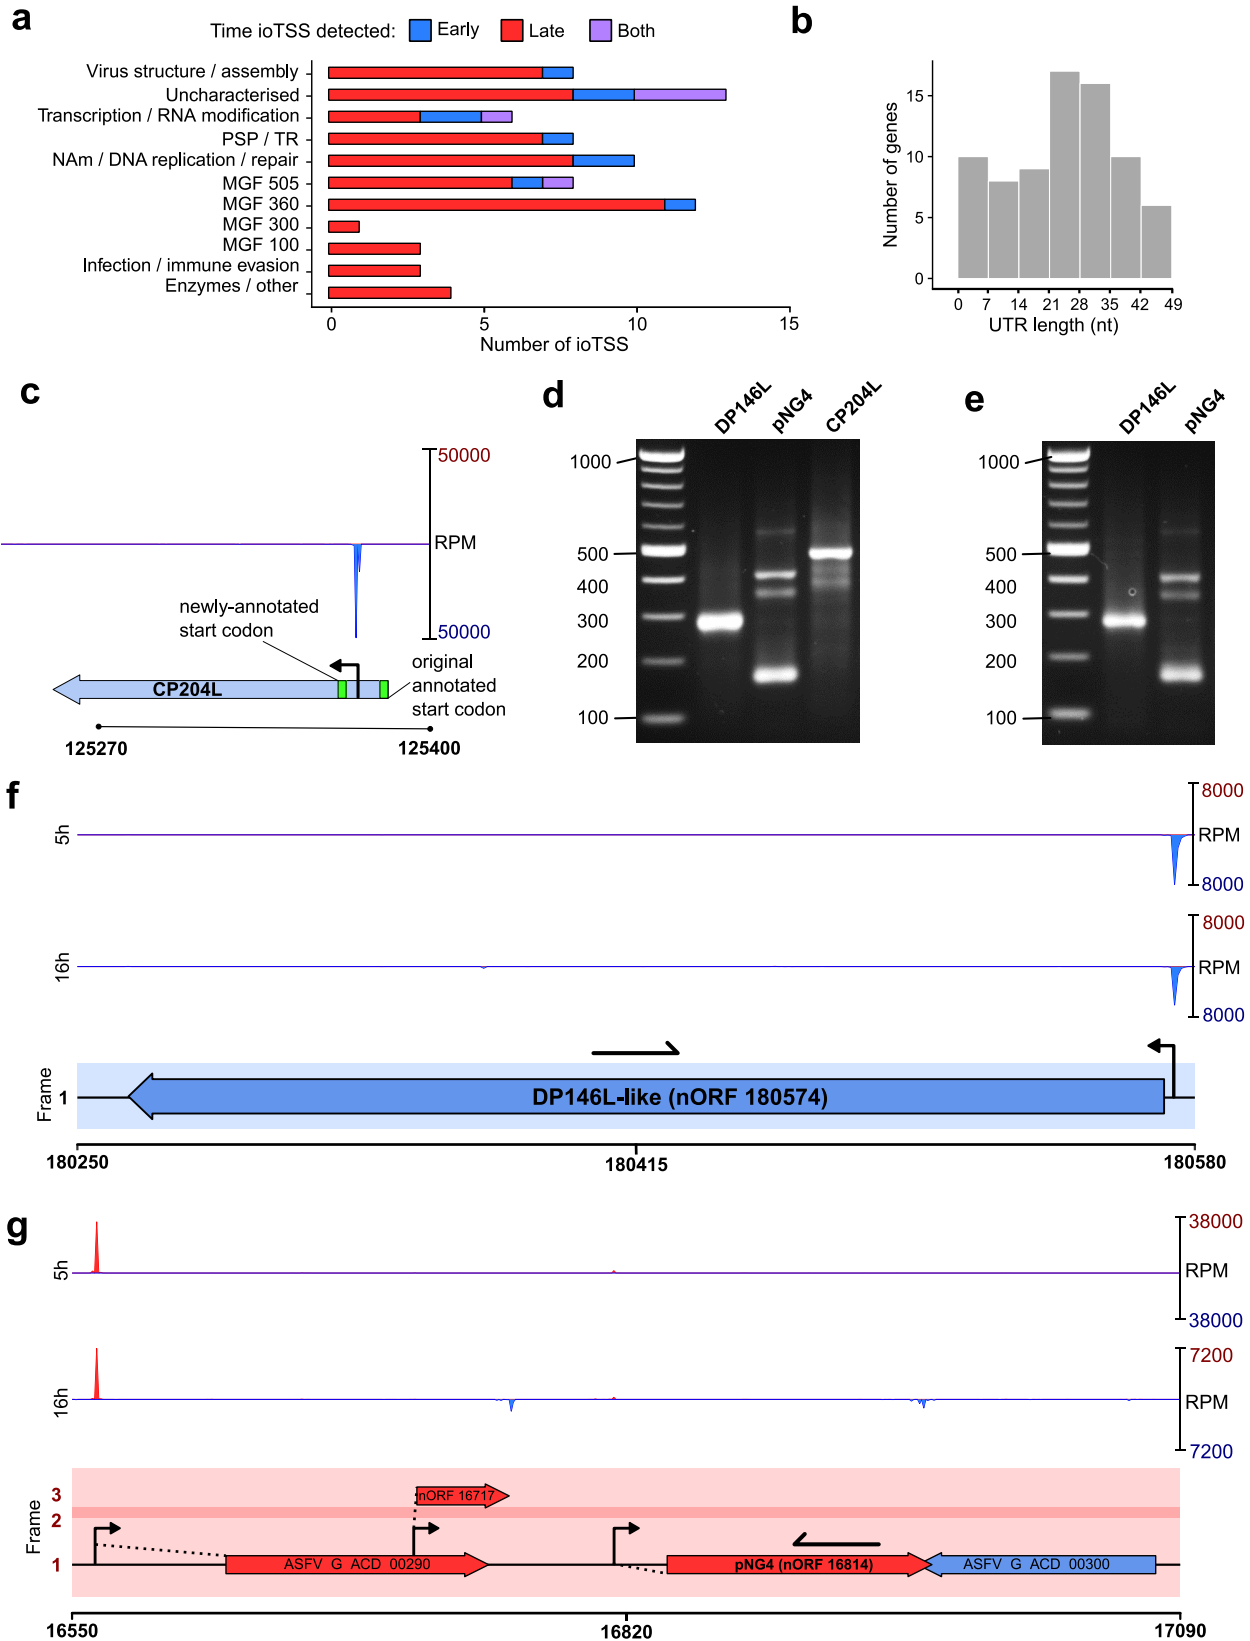

1095 Figure 9. Summary of intra-ORF TSSs (ioTSSs) and nORFs detected in the GRG genome, further information  
 1096 in Supplementary Table 2. (a) Summarises the gene types in which ioTSSs were detected, showing an  
 1097 overrepresentation of MGFs, especially from families 360 and 505, furthermore, the majority of ioTSSs  
 1098 are detected at 16 hpi. (b) For ioTSSs in-frame with the original, summarised are the subsequent UTR  
 1099 lengths i.e. distance from TSS to next in frame ATG start codon, which could generate a truncation variant.  
 1100 (c) Example of a miss-annotation for CP204L, whereby the pTSS is downstream the predicted start codon.  
 1101 (d) and (e) show the results of 5'RACE for three genes (DP146L, pNG4, and CP204L, see methods for  
 1102 primers), at 5 hpi and 16 hpi, respectively. Examples of genome regions around DP146L (f) and pNG4 (g),  
 1103 wherein ioTSSs were detected with capacity for altering ORF length in subsequent transcripts, and  
 1104 therefore protein output. Primers used for 5'RACE for DP146L and pNG4 are represented as black arrows  
 1105 in (f) and (g), respectively.

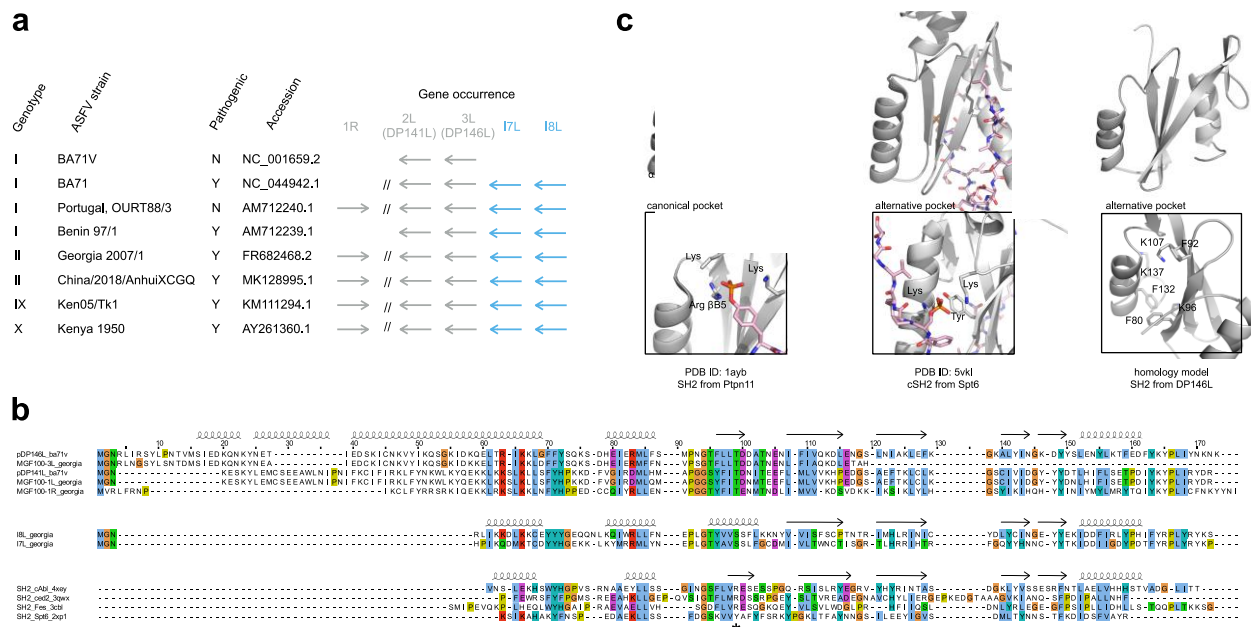

1106  
 1107 Figure 10. Function prediction of MGF 100 genes. (a) Occurrence of MGF 100 genes in genomes of selected  
 1108 ASFV strains. Genome of the China/2018 strain missed annotation of MGF 100-3L gene, which is located  
 1109 at positions 180315–180617 on the minus strand. (b) Structure-guided multiple sequence alignment of  
 1110 selected MGF 100 members and SH2 domains. Secondary structure for MGF 100 members was predicted  
 1111 with PSIPRED (springs, A-helices; arrows, B-strands). (c) Structures of SH2 domains (from right to left):  
 1112 canonical recognising pTyr (PDB ID 1ayb, mouse Ptpn11), atypical recognising pSer (PDB ID 5vkl, yeast

1113 Spt6), and homology model of DP146L from ASFV strain BA71V (based on PDB IDs 4xey and 4fl3). Binding  
 1114 pockets are shown in the bottom panels.

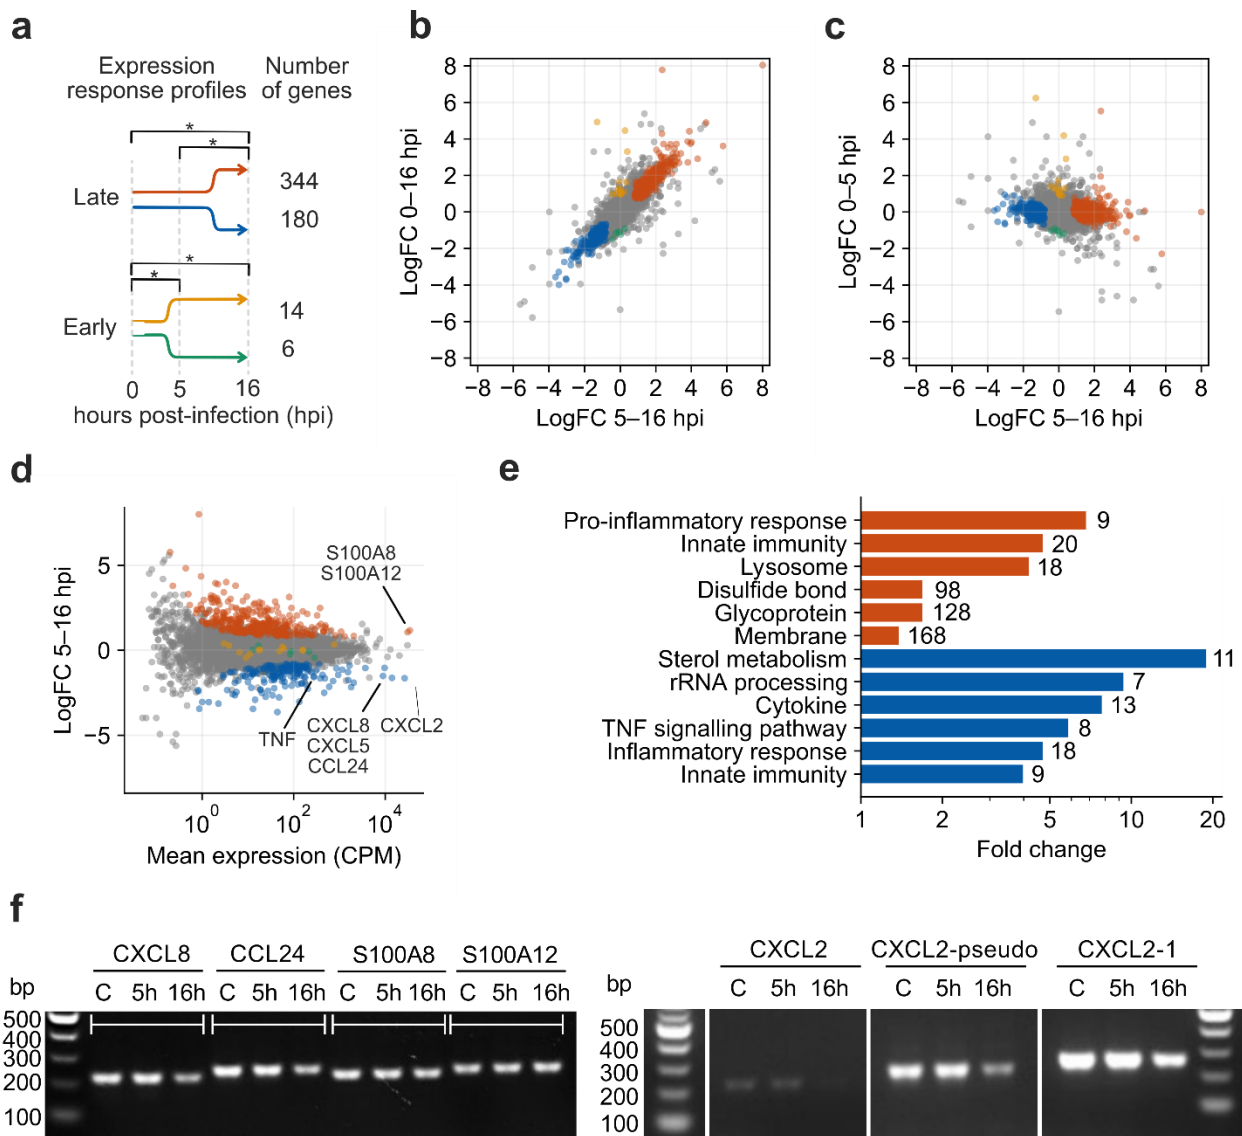

1115  
 1116 Figure 11. Changes in the swine macrophage transcriptome upon ASFV GRG infection. (a) Major  
 1117 expression response profiles of the pig macrophage transcriptome. Late response genes are significantly  
 1118 deregulated (false discovery rate < 0.05) in one direction both between 0 and 16 hpi as well as between  
 1119 5 and 16 hpi, but not between 0 and 5 hpi. Early response genes are significantly deregulated in one  
 1120 direction both between 0 and 5 hpi as well as 0 and 16 hpi, but not between 5 and 16 hpi. (b) Relationship  
 1121 of log fold changes (logFC) of TSS-derived gene expression levels of the total 9,384 swine genes expressed  
 1122 in macrophages between 5–16 hpi and 0–16 hpi. Colors correspond to the response groups from the panel

1123 a. (c) Relationship of log fold changes of TSS-derived gene expression levels of the total 9,384 swine genes  
1124 expressed in macrophages between 5–16 hpi and 0–5 hpi. (d) MA plot of the TSS-derived gene expression  
1125 levels between 5 and 16 hpi based on differential expression analysis with edgeR (94,101). (e)  
1126 Representative overrepresented functional annotations of the upregulated (red) and downregulated  
1127 (blue) macrophage genes following late transcription response (Benjamini-corrected p-value lower than  
1128 0.05). Numbers on the right to the bars indicate total number of genes from a given group annotated with  
1129 a given annotation. (f) RT-PCR of four genes of interest indicated in (d). ‘C’ is the uninfected macrophage  
1130 control, NTC is the Non Template Control for each PCR, excluding template DNA. See methods for primers  
1131 used.

1132 Supplementary Figures

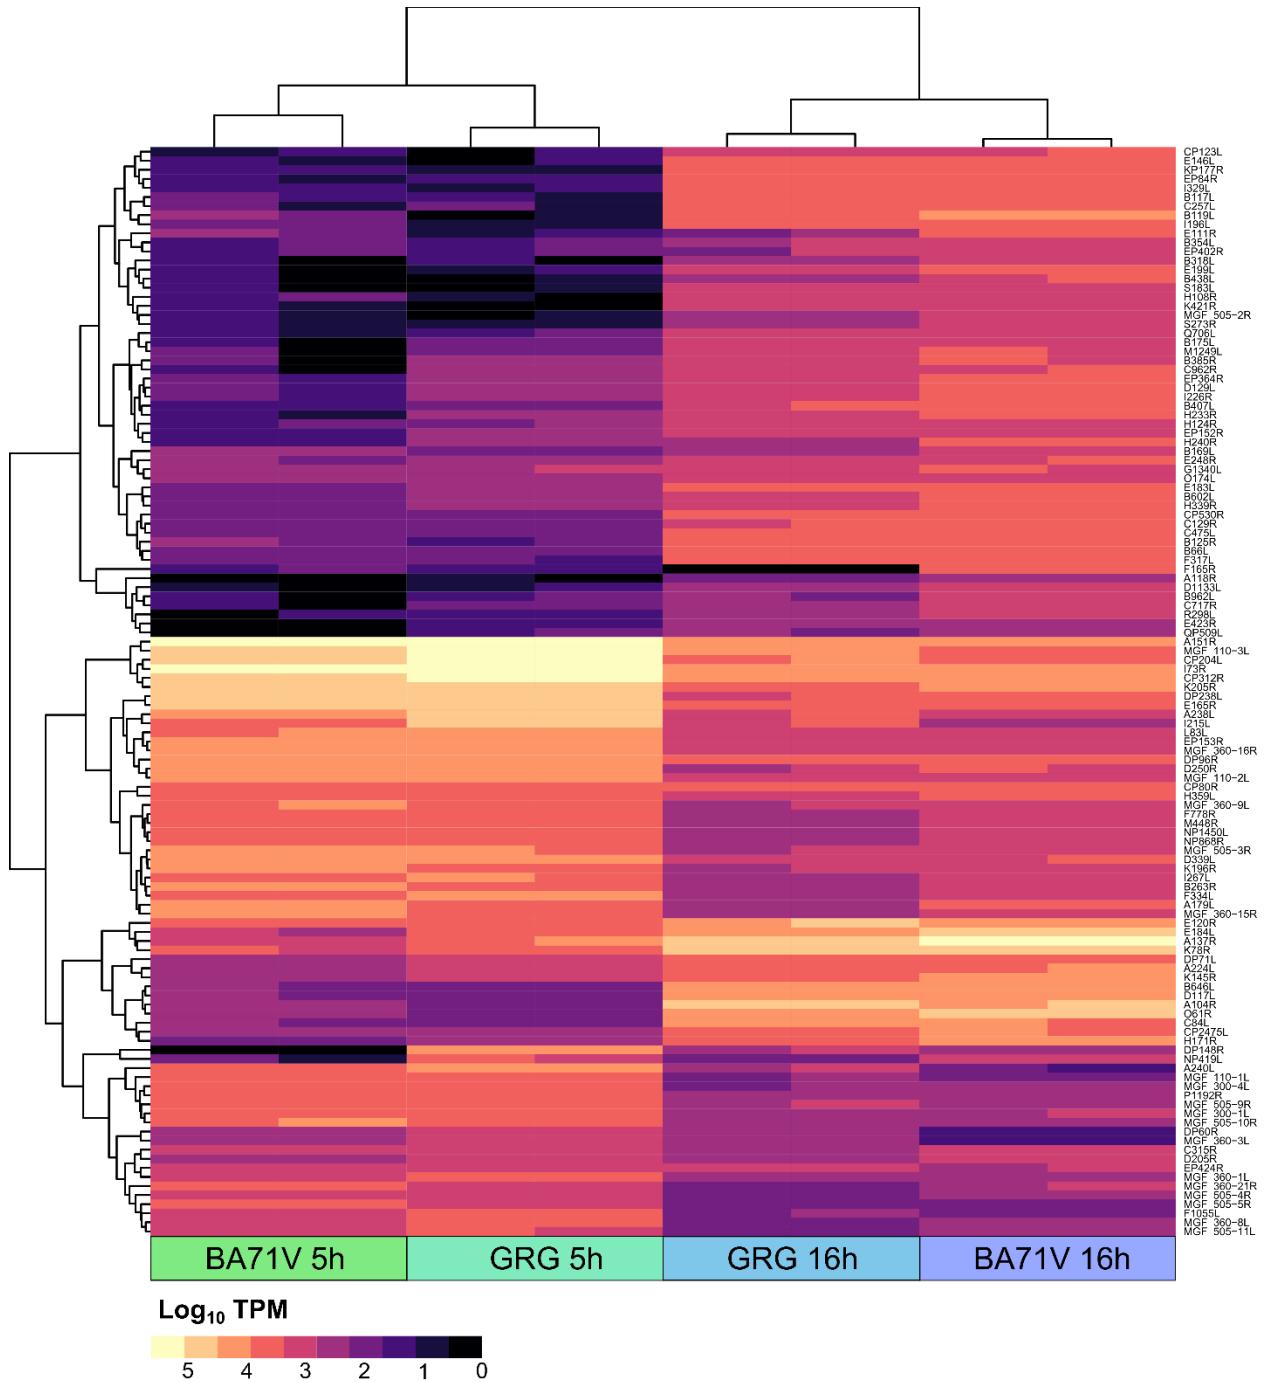

1133

1134 Supplementary Figure 1. Clustered heatmap of ASFV gene expression for the genes shared between  
1135 BA71V and GRG that showed significant differential expression. R package 'pheatmap'-generated  
1136 clustered heatmap of per-gene RPM values for genes shared between GRG and BA71V, across time-points



1137 (5 hpi and 16 hpi), strains, with biological replicates as separate columns. Gene names for each row are  
 1138 listed on the right and both rows and columns were clustered according to Euclidean distance.

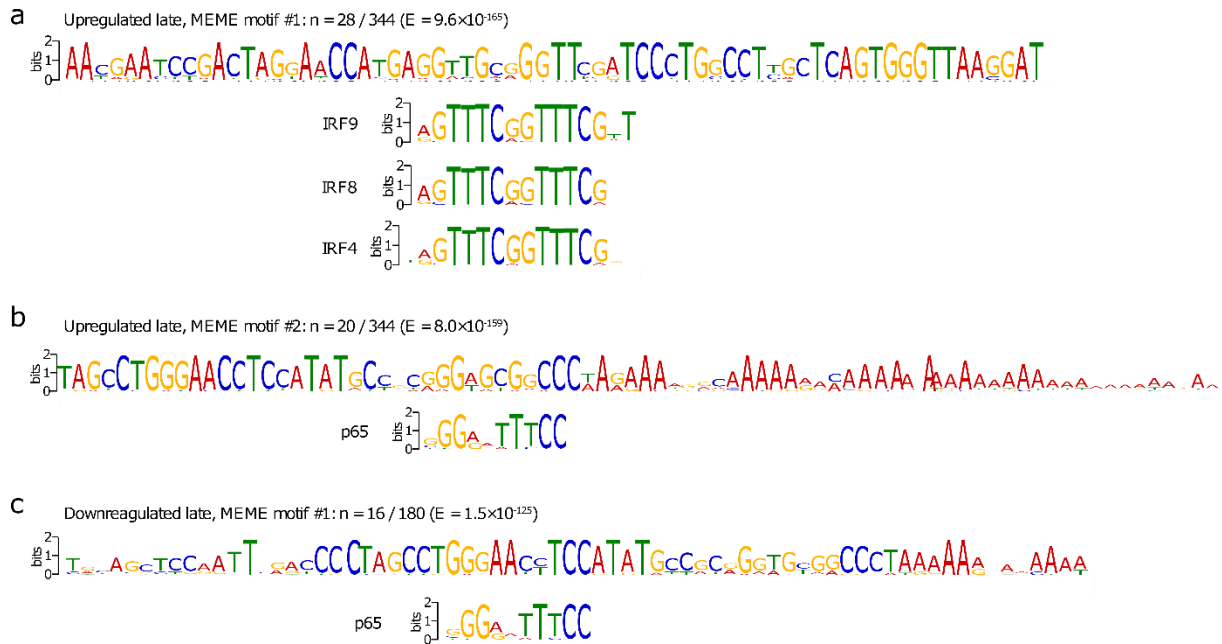

1139  
 1140 Supplementary Figure 2. Comparison of top-scored MEME motifs enriched in promoters of deregulated  
 1141 host genes to sequences recognised by human transcription factors: a) Motif found in 28 upregulated  
 1142 gene promoters similar to sequences recognised by human interferon response factors (JASPAR  
 1143 accessions MA0653.1: IRF9, MA0652.1: IRF8, MA1419.1: IRF4). b) Motif found in 20 upregulated gene  
 1144 promoters similar to sequences recognised by human p65/RELA protein (JASPAR accessions MA0107.1).  
 1145 c) Motif found in 16 downregulated gene promoters similar to sequences recognised by human p65/RELA  
 1146 protein (JASPAR accessions MA0107.1).

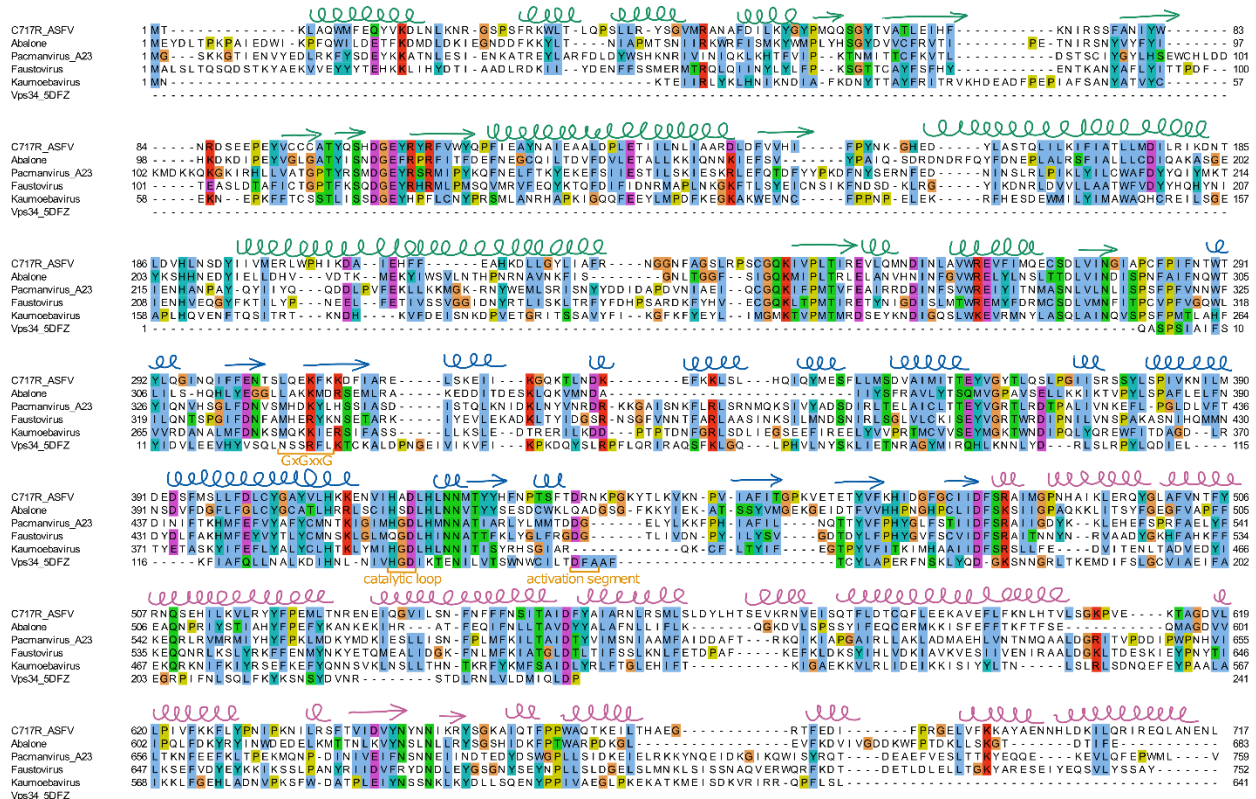

1147

1148 Supplementary Figure 3. Structure-guided multiple sequence alignment of selected C717R homologs and  
 1149 the kinase domain of Vps34 (PDB ID 5dfz). Secondary structure for C717R from African Swine Fever Virus,  
 1150 GRG (C717R-ASFV) was predicted with PSIPRED (springs, A-helices; arrows, B-strands). Colors of the  
 1151 secondary structure elements correspond to predicted domains: unknown N-terminal domain (green),  
 1152 kinase domain (blue), and alpha-helical C-terminal domain (pink). The C717R homologs were aligned with  
 1153 MAFFT and Vps34 was aligned based on HHpred mapping.

**a**

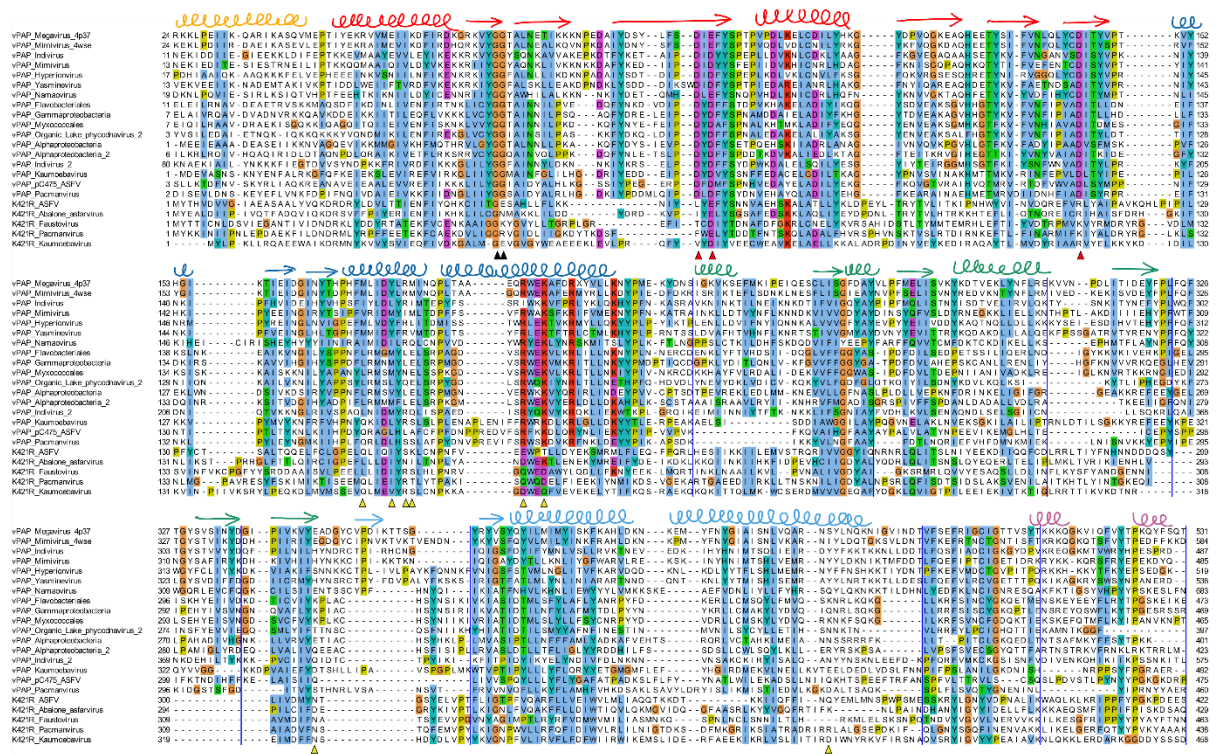

**b**

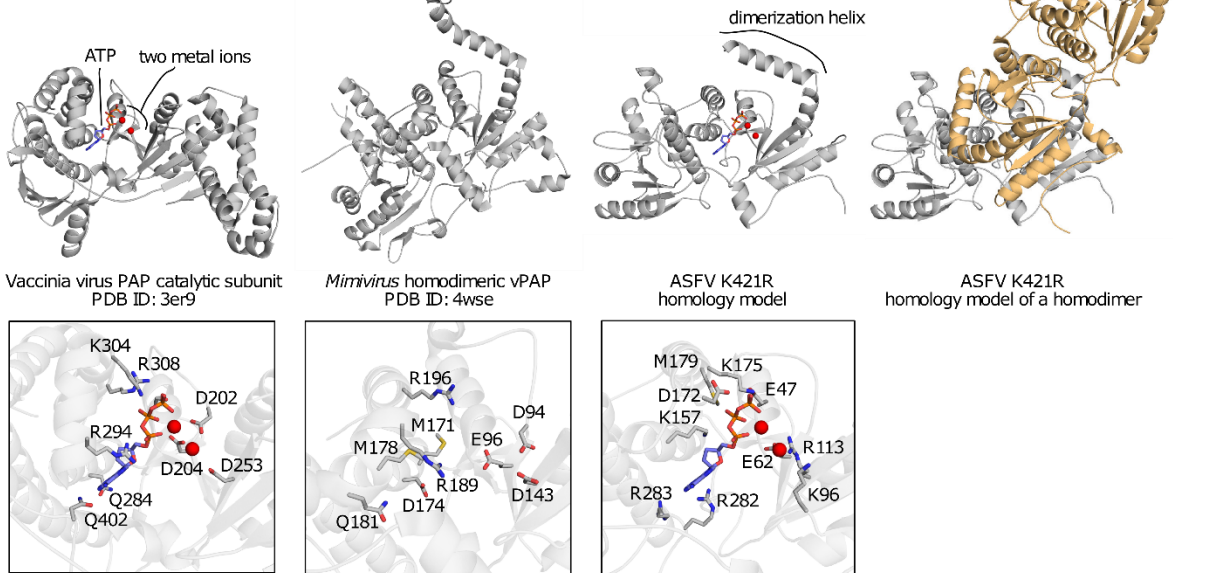

1154

1155

1156

1157

Supplementary Figure 4. Function prediction of K421R. A. Structure-guided multiple sequence alignment of selected K421R homologs and viral poly(A) polymerases (vPAP). Secondary structure was predicted with PSIPRED (springs, A-helices; arrows, B-strands). Colors of the secondary structure elements

1158 correspond to predicted domains: dimerization domain (yellow), catalytic domain (red and blue),  
1159 duplicated domain (green and blue), and C-terminal domain (purple). The ASFV-K421R sequence  
1160 corresponds to K421R from GRG strain. Full set of sequences was aligned using MAFFT, following by  
1161 manual corrections using known and predicted secondary structures. Red, black and, yellow triangles  
1162 depict acidic residues from the described vPAP active site, the GG motif conserved in NTases, and residues  
1163 usually coordinating ATP, respectively. Blue vertical lines denote insertions of non-conserved residues. B.  
1164 Homology model of ASFV K421R compared to Vaccinia and *Mimivirus* vPAPs, shown in a cartoon  
1165 representation (top panel) together with zoom-in views on the potential active sites (bottom panel). Five  
1166 alternative models were generated with Modeller using templates of homodimeric *Megavirus chiliensis*  
1167 and *Mimivirus* vPAPs (PDB IDs 4p37 and 4wse) with symmetric restraints, and the best one selected using  
1168 the DOPE (Discrete Optimized Protein Energy) method.

1169

## 1170 [Supplementary Tables](#)

1171 Supplementary Table 1. (a) Summary of CAGE-seq reads mapping to the ASFV and *Sus scrofa* genomes  
1172 using Bowtie2 and HISAT2, respectively (see methods). Bed file output of clusters detected from separate  
1173 CAGEfightR analysis from CAGE-seq data at 5 hpi (b) and 16 hpi (c) post-infection. (d) Table summarizing  
1174 pTSS locations in GFF format for either annotated genes or nORFs. TSSs for MGF 100-3L, MGF 110-11L,  
1175 MGF 300-2R, E66L, C62L, and KP93L were not detected. (e) Results from DESeq2 analysis of CAGE-seq  
1176 peaks at TSSs - both those for primary gene TSSs and those for novel ORFs. DESeq2 output is explained in  
1177 Love et al. (41). The DESeq2 default adjusted p-value is a Wald test p-value with Benjamini–Hochberg  
1178 correction (102). Per sample coverage is reported in transcripts per million mapped reads (TPM) in the  
1179 final four columns. (f) Updated genome coordinates of annotated ORFs in the GRG genome, and for 5 hpi  
1180 and 16 hpi each gene's stage-specific pTSS locations, with their nt distances relative to one another. The  
1181 Untranslated Region or UTR length for each gene is shown (nt distance from each pTSS to the ORF start  
1182 codon), and lastly whether the gene is differently expressed: early, late or not-classified (NC).

1183 Supplementary Table 2. Summary of TSSs detected which potentially generate novel ORFs, unannotated  
1184 in the GRG genome by identifying CAGEfightR-annotated TSSs with an unannotated ORF encoded  
1185 downstream. (a) All putative unannotated ORF-generating TSSs. (b) The ioTSSs - overlapping in-frame with  
1186 annotated ORFs, with potential for generating truncation variants. (c) TSSs with potential for encoding

1187 ORFs downstream (down to 5 residues) which are not among the 189 ORFs annotated in the FR682468.1  
1188 genome.

1189 Supplementary Table 3. Results from MEME motif (48) analysis of DNA sequences 35 bp upstream of  
1190 conserved genes between ASFV and BA71V split into 5 clusters described in Figure 6.

1191 Supplementary Table 4. List of CAGE-seq peaks (i.e., CAGE-derived transcription start sites, TSSs) found in  
1192 *Sus scrofa* ASFV-infected macrophages. TSSs were mapped to the nearest *S. scrofa* 11.1 Ensembl (103)  
1193 protein-coding genes using the RECLU pipeline (93). The read coverage was normalised to counts (reads)  
1194 per million (CPM).

1195 Supplementary Table 5. TSS-based transcript levels of *S. scrofa* macrophage-expressed genes. The read  
1196 coverage was summed over all TSSs assigned to a given gene and normalised to counts (reads) per million  
1197 (CPM). Significantly down- or upregulated genes were found with edgeR (94,101) at false discovery rate  
1198 of 0.05.

1199 Supplementary Table 6. Functional categories enriched in swine macrophage-expressed genes down- or  
1200 upregulated at 16 hpi p.i. found with DAVID 6.8 Bioinformatics Resources (95), using best BLASTP (96,104)  
1201 human hits. Supplementary Table 7. (a) ASFV and host genes whose expression level was assessed by RT-  
1202 PCR. Primer pair sequences, PCR conditions and Accession Numbers of the sequences used for primer  
1203 design are shown. (b) Primer details and qPCR conditions used for quantification of C315R gene  
1204 expression. (c) Genes analyzed with 5'RACE and details of the primers used. The predicted locations of  
1205 the genes on the GRG complete genome (Accession FR682468) as well as the expected length of upstream  
1206 untranslated regions (5'UTR) according to the detected TSSs in CAGE-seq are shown. The final expected  
1207 amplicon sizes in the last column are the result of PCR with GSP3 nested primer (GSP2 in pNG4) plus 36  
1208 bp added to the final sequence as a result of the 5'RACE polynucleotide tail addition and amplification  
1209 with "Abridged Anchor Primer" (AAP). GSP1 primer from pNG4 was extended with 50 non-annealing  
1210 nucleotides (small caps italic) to increase the cDNA length.
